1 **FOXP4 differentially controls cold-induced beige adipocyte**  
2 **differentiation and thermogenesis**

3

4 Fuhua Wang<sup>1</sup>, Shuqin Xu<sup>1</sup>, Tienan Chen<sup>1</sup>, Shifeng Ling<sup>1</sup>, Wei Zhang<sup>1</sup>, Shaojiao Wang<sup>1</sup>, Rujiang  
5 Zhou<sup>1</sup>, Xuechun Xia<sup>1</sup>, Zhengju Yao<sup>1</sup>, Pengxiao Li<sup>2</sup>, Xiaodong Zhao<sup>2</sup>, Jiqui Wang<sup>3</sup>, Xizhi Guo<sup>1#</sup>

6

7 Affiliations

8 <sup>1</sup>Bio-X-Renji Hospital Research Center, Renji Hospital, School of Medicine, Shanghai Jiao Tong  
9 University, Shanghai, 200240, China

10 <sup>2</sup>Shanghai Center for Systems Biomedicine, Shanghai Jiao Tong University, Shanghai, 200240,  
11 China

12 <sup>3</sup> Department of Endocrinology and Metabolism, Ruijin Hospital, Shanghai Jiao Tong University  
13 School of Medicine, 200025, China

14

15 # Correspondence: Xizhi Guo, xzguo2005@sjtu.edu.cn

16

17 Address: #800 Dongchuan Road, Biomedical Building#1-205, Shanghai, China, 200240

18 Tel/Fax: 86-021-34206736

19

20

21

22

23

24

25

## 1 **ABSTRACT**

2 Beige adipocytes possess a discrete developmental origin and notable plasticity in  
3 thermogenic capacity in response to various environmental cues. But the transcriptional  
4 machinery controlling beige adipocyte development and thermogenesis remains largely  
5 unknown. By analyzing beige adipocyte-specific knockout mice, we identified a  
6 transcription factor, Forkhead Box P4 (FOXP4) that differentially governs beige  
7 adipocyte differentiation and activation. Depletion of *Foxp4* caused a decline in the  
8 frequency of beige preadipocytes by switching their cell fate towards fibroblastic cells  
9 at the expense of beige adipocytes. However, we observed that ablation of *Foxp4* in  
10 differentiated adipocytes profoundly potentiated their thermogenesis upon cold  
11 exposure. Of note, the outcome of *Foxp4*-deficiency on UCP1-mediated thermogenesis  
12 was confined to beige adipocytes, rather than to brown adipocytes. Taken together, we  
13 submit that FOXP4 primes beige adipocyte cell fate commitment and differentiation by  
14 potent transcriptional repression of the thermogenic program.

15

16 **KEY WORDS:** Beige adipocyte, Cell fate commitment, Thermogenesis, Transcription  
17 factor, FOXP4

18

## 19 **INTRODUCTION**

20 Beige adipocytes, a population of thermogenic adipocytes distinct from brown  
21 adipocytes, have recently caught mainstream attention. Their relevance to adult humans  
22 holds promise as a new therapeutic target in combating obesity and other metabolic  
23 disorders. Beige adipocytes emerge within white adipose tissue (WAT) depots in  
24 response to various environmental cues, including chronic cold acclimation, exercise,  
25  $\beta$ 3-adrenergic receptor (AR) agonists, cancer cachexia, and tissue injury (Barbatelli et  
26 al., 2010; Rosenwald et al., 2013). As with classical brown adipocytes, beige adipocytes  
27 present with multilocular morphology and produce heat mainly through UCP1-  
28 mediated thermogenesis. Lineage tracing studies demonstrated that beige adipocytes  
29 consist of heterogeneous subpopulations of distinct origins depending on the nature of

1 external induction stimuli (Berry et al., 2016). For example, beige adipocytes originate  
2 either from PDGFR $\alpha$ <sup>+</sup> stromal progenitor cells (Han et al., 2021; Lee et al., 2015; Lee  
3 et al., 2012), or from mural perivascular cells when targeted by *SMA-CreERT* (Long et  
4 al., 2014). These two beige progenitor populations are not mutually exclusive. A recent  
5 study noted that PDGFR $\alpha$ <sup>+</sup> progenitor cells are required for developmental  
6 adipogenesis, but not for adult beige adipogenesis (Shin et al., 2020). Further evidence  
7 showed that beige precursor cells are a population distinct from brown or white fat  
8 precursors with selective cell surface markers, including CD81 (Oguri et al., 2020) and  
9 CD137 (Wu et al., 2012).

10 Following cell fate determination and differentiation, beige adipocytes possess  
11 inducible and reversible thermogenic capacity, as well as plasticity in cellular  
12 morphology in response to environmental stimuli (Paulo and Wang, 2019). The first  
13 wave of *de novo* beige adipocytes express UCP1 with multilocular morphology. They  
14 appear in WAT of mice independent of temperature conditions at the peri-weaning stage  
15 of development (Wu et al., 2020). At the adult stage, these beige adipocytes regress,  
16 lose UCP1 expression and are morphologically identical to white adipocytes at room  
17 temperature. The dormant beige adipocytes can reappear in response to cold challenge,  
18 and reverse back to white-like cellular morphology at conditions of re-warming or  
19 withdrawal of the  $\beta$ 3-AR agonist (Roh et al., 2018; Rosenwald et al., 2013). Previous  
20 studies have proposed that cold-induced beige adipocytes predominantly arise from  
21 transdifferentiation of preexisting white adipocytes (Barbatelli et al., 2010; Cattaneo et  
22 al., 2020; Rosenwald et al., 2013). However, this view requires cautious assessment  
23 because of the current technical limitations to determine how many of those pre-  
24 existing “white” adipocytes are *de facto* latent beige adipocytes with UCP1<sup>+</sup> history. Of  
25 note, the conversion between thermogenically latent and active states in beige fat cells  
26 may be attributed to reversible processes of mitochondrial biogenesis and clearance  
27 (Altshuler-Keylin et al., 2016), as well as to chromatin reprogramming and function of  
28 specific transcriptional machinery (Roh et al., 2018).

29 Despite these differences in developmental origins and physiological functions of  
30 brown, beige and white adipocytes, these cell types share a similar transcriptional

1 cascade that controls the process of fat cell differentiation. Several factors are  
2 commonly employed by both brown and beige adipocytes, including *Cebp $\alpha/\beta$* -PPAR $\gamma$   
3 cascades for early cell fate commitment and differentiation, as well as activators of  
4 EBF2, *Prdm16* and *PGC1 $\alpha$*  for thermogenesis (Shapira and Seale, 2019; Wang and  
5 Seale, 2016). However, as aforementioned, beige adipocyte plasticity in cell  
6 differentiation and thermogenesis involves a cell-specific changes in morphology,  
7 transcription, and chromatin landscape. In contrast to our significant understanding of  
8 brown adipocyte transcription, the beige-selective regulatory machinery remains  
9 largely unclear.

10 Forkhead Box P4 (FOXP4) typically functions as a transcription factor that  
11 regulates islet  $\alpha$  cell proliferation (Spaeth et al., 2015), breast cancer invasion (Ma and  
12 Zhang, 2019), and speech/language (Snijders Blok et al., 2021). Our previous studies  
13 have shown that FOXP4 also controls endochondral ossification via a complex with  
14 FOXP1 and FOXP2 (Zhao et al., 2015). In this study, we employed *SMA-Cre<sup>ERT</sup>* and  
15 *AdipoQ-Cre* mice to knockout *Foxp4* in beige precursors and differentiated beige cells,  
16 respectively. Inactivation of *Foxp4* in progenitor cells impaired beige fat cell  
17 differentiation and switched them to pro-fibrotic cell potency. In contrast, *Foxp4*  
18 deficiency in differentiated beige adipocytes exacerbated their cold-induced  
19 thermogenesis. Mechanistically, we found that FOXP4 directly repressed transcription  
20 of *PDGFR $\alpha$* , *PGC1 $\alpha$*  and *Cebp $\beta$* , thereby acting as a transcriptional “brake” on these  
21 critical components of beige adipocyte regulation. Together, our results suggest that  
22 FOXP4 not only primes early cell fate commitment of beige adipocytes, but also  
23 attenuates their cold-induced thermogenesis.

24

## 25 **RESULTS**

### 26 **Dynamical expression of *Foxp4* during beige adipocyte differentiation**

27 To investigate the expression pattern of FOXP4 in adipose tissues, two representative  
28 subpopulations of adipocytes, interscapular brown adipose tissues (BAT) and  
29 subcutaneous white adipose tissues (sWAT), were obtained from 8-week-old wild-type

1 C57BL/6J mice that were housed at room temperature (23 °C). High levels of FOXP4  
2 expression were detected within brown and white adipocytes by immunofluorescence  
3 analyses (Fig. 1A). Next, stromal vascular fraction (SVF) cells isolated from sWAT of  
4 wild type mice were induced to beige adipocytes *in vitro* by culturing in beige  
5 adipogenic media for 7 days. As expected, *PPAR $\gamma$*  and *Ucp1* expression levels were  
6 elevated during beige adipocyte differentiation, whereas *Foxp4* expression peaked at  
7 day 2 of induction and declined swiftly thereafter (Fig. 1B). In addition, western  
8 blotting and qPCR analysis revealed that FOXP4 expression in BAT and sWAT was  
9 slightly increased in response to cold exposure (Supplementary Fig. S1A, B). These  
10 dynamic alterations in expression implicated a phase-specific function of FOXP4  
11 during beige adipocyte differentiation.

12

### 13 **Ablation of *Foxp4* impairs beige adipocyte differentiation**

14 A major proportion of adult beige adipocytes is reported to be derived from mural  
15 progenitor cells within sWAT, which could be selectively and conditionally targeted by  
16 *SMA-Cre<sup>ERT</sup>* (Long et al., 2014). Tamoxifen-inducible *Foxp4* conditional knockout  
17 mice (thereafter designated as *Foxp4<sup>Sma</sup><sup>Ert $\Delta/\Delta$</sup>* ) were generated by crossing *Foxp4<sup>fl/fl</sup>* with  
18 *SMA-Cre<sup>ERT</sup>* mice. SVF cells obtained from sWAT of *Foxp4<sup>Sma</sup><sup>Ert $\Delta/\Delta$</sup>*  were maintained  
19 for 2 days within cultures with tamoxifen, followed by another 6-days in beige  
20 adipogenic differentiation cultures (Fig. 1C). As shown in Fig. 1E, beige cell  
21 differentiation was impaired following loss of *Foxp4*, as evidenced by oil red staining  
22 (Fig. 1D). In addition, we observed decreased expression levels of *Foxp4* (Fig. 1E),  
23 beige-specific (*CD137*, *Klh13*, *Slc27a1*) (Fig. 1F), and thermogenic marker (*PGC-1 $\alpha$* ,  
24 *Ucp1*, *Cebp $\beta$* , *Cidea*, *Dio2*, *Elovl3*, *Cox2*, *Cox4il*, *Cox5b*, *Cox7a*) genes (Fig. 1G).

25 The defects of beige cell differentiation may stem from perturbed *de novo*  
26 biogenesis. We next tracked CD29<sup>+</sup> PDGFR $\alpha$ <sup>+</sup> Sca1<sup>+</sup>CD24<sup>+</sup> adipocyte progenitor cells  
27 (APC) within WAT-SVF 24-hour post tamoxifen administration by flow cytometry  
28 (FACS) as described previously (Berry and Rodeheffer, 2013; Lee et al., 2015). The  
29 frequency of beige APC (defined as CD31<sup>-</sup>CD45<sup>-</sup>PDGFR $\alpha$ <sup>+</sup>Sca1<sup>+</sup>) and beige  
30 preadipocyte (defined as CD31<sup>-</sup>CD45<sup>-</sup>PDGFR $\alpha$ <sup>+</sup>Sca1<sup>+</sup>CD24<sup>+</sup>) were relatively lower in

1 SVF cells of *Foxp4*<sup>Sma<sup>Ert</sup>Δ/Δ</sup> as compared to that of *Foxp4*<sup>fl/fl</sup> (Fig. 1H, I). These  
2 observations indicated that FOXP4 inactivation impaired beige adipocyte  
3 differentiation, potentially the early beige cell commitment.

4

5 **Deletion of *Foxp4* switches stromal progenitor cells towards fibroblasts at the**  
6 **expense of beige adipocytes**

7 FACS analysis indicates the potential role of FOXP4 in beige cell early commitment.  
8 PDGFR $\alpha$ <sup>+</sup> stromal progenitor cells also give rise to beige adipocytes during early  
9 development (Gao et al., 2018), also have the potential to adopt fibroblastic cell fate  
10 upon activation of the PDGFR $\alpha$  pathway (Shin et al., 2020; Sun et al., 2017).  
11 Unfortunately, when *Foxp4* was inactivated by *SMA-Cre*, the knockout mice showed  
12 defects in postnatal development and growth (data not shown). This blocked our ability  
13 to investigate FOXP4 function during beige cell development. To circumvent this  
14 problem, we transfected the SVF cells from *Foxp4*<sup>fl/fl</sup> sWAT with either retroviral  
15 *pMSCV-Cre* or, as a control, retroviral *pMSCV-GFP*. This approach allowed us to  
16 achieve efficient and extensive inactivation of *Foxp4* in progenitors. As shown in Fig.  
17 2A-C, beige adipocyte differentiation in *Foxp4*-deficient stromal progenitor cells  
18 (designated as *Foxp4*<sup>pMSCV $\Delta/\Delta$</sup> ) was impaired, as evidenced by oil red staining and down-  
19 regulation of a set of thermogenic (*PPAR $\gamma$* , *PGC-1 $\alpha$* , *Adrb3*, *Ucp1*, *Cidea*, *Dio2*, *Elovl3*)  
20 and beige-elective signature genes (*CD137*, *Tbx1*, *Tmem16*, *Slc27a1*). Similar, but less  
21 penetrant alterations in thermogenesis were detected in BAT-SVF cells  
22 (Supplementary Fig. S2A-C). In contrast, deletion of *Foxp4* by *pMSCV-Cre* had little  
23 effect on general adipogenesis, as evidenced by Oil red staining and qPCR analysis  
24 based on sWAT-SVF adipogenic cultures without T3 and TZDs (Supplementary Fig.  
25 S2E, F).

26 Interestingly, RNA-seq analysis revealed that an array of collagen fibril-related  
27 transcripts were relatively enriched in *Foxp4*<sup>pMSCV $\Delta/\Delta$</sup>  beige cells as compared to controls  
28 (Fig. 2D). Elevated expression levels of several of these pro-fibrotic genes (*Colla1*,  
29 *Col3a1*, *Col4a1*, *Col6a3*, *Mmp2*, *Timp1*, *CD9*) were validated by qPCR analysis (Fig.  
30 2E). Accordingly, similar alterations of profibrotic marker genes were observed in

1 beige cells obtained from sWAT-SVF of *Foxp4<sup>Sma<sup>Ert</sup>Δ/Δ</sup>* mice following *Foxp4*  
2 inactivation induced by tamoxifen (Supplementary Fig. S2D). Thus, FOXP4 expression  
3 is required to balance fibroblast-beige ratios in stromal progenitor cells.

4       Given the unexpected finding that high levels of PDGFR $\alpha$  in stromal progenitor  
5 cells switch beige adipocytes to fibroblasts, we then investigated the impact of FOXP4  
6 on *Pdgfra* gene transcription. As shown in Fig. 2F and G, qPCR analysis revealed that  
7 *Pdgfra* transcripts were increased in *Foxp4<sup>pMSCV</sup>Δ/Δ* or in *Foxp4<sup>Sma<sup>Ert</sup>Δ/Δ</sup>* cells. In  
8 addition, Chip-seq analysis of SVF progenitor cells detected relatively high enrichment  
9 of FOXP4 binding sites within the promoter region of *Pdgfra* (arrow in Fig. 2H).  
10 Luciferase reporter assays employing a *Pdgfra* promoter-driven luciferase as substrate  
11 validated that FOXP4 repressed transcription of *Pdgfra* in 293T cells (Fig. 2I).  
12 Together these data suggested that FOXP4 controls beige adipocyte cell fate  
13 commitment from progenitors by directly modulating *Pdgfra* transcription.

14

#### 15 **Ablation of *Foxp4* modestly augments juvenile and mature beige adipocyte** 16 **thermogenesis**

17 The first wave of *de novo* beige adipocyte biogenesis and UCP1 activation occurs  
18 within sWAT at peri-weaning stage independent of temperature conditions (Wang et al.,  
19 2017; Wu et al., 2020). To evaluate the potential impact of *Foxp4* deficiency on beige  
20 adipocyte thermogenesis, we eliminated *Foxp4* in differentiated adipocytes with  
21 *AdipoQ-Cre* (Eguchi et al., 2011), hereafter designated as *Foxp4<sup>AdipoQ</sup>Δ/Δ*. We confirmed  
22 (Supplementary Fig.S3A, B) that FOXP4 was efficiently reduced at the mRNA and  
23 protein levels in BAT and sWAT from *Foxp4<sup>AdipoQ</sup>Δ/Δ* mice. *Foxp4<sup>AdipoQ</sup>Δ/Δ* mice appeared  
24 relatively normal in size and in fat depots of BAT and sWAT at 3 weeks of age (Fig.  
25 3A, B). H&E staining and IHC analysis revealed that higher numbers of UCP1<sup>+</sup> beige  
26 adipocytes resided in sWAT from *Foxp4<sup>AdipoQ</sup>Δ/Δ* knockout mice than in controls (Fig.  
27 3C). Consistent with that observation, qPCR analysis confirmed the up-regulation of a  
28 set of thermogenic and mitochondrial signature genes (*Cebp $\beta$* , *Cidea*, *Dio2*, *Elovl3*,  
29 *PGC-1 $\alpha$* , *Ucp1*, *Cox2*, *Cox4il*, *Cox5b*, *Cox8b*) (Fig. 3D, E). However, the expression  
30 of several beige selective marker genes (*CD137*, *CD40*, *Klh13*, *Tbx1*) showed no



1 obvious increases (Fig. 3F). These observations suggested that FOXP4 boosted juvenile  
2 beige adipocyte activation, but had little effect on their early differentiation.

3 The transcriptional pathway underlying adult beige cell differentiation and  
4 thermogenic activation is distinct from that of the juvenile at the peri-weaning stage  
5 (Wu et al., 2020). *Foxp4<sup>AdipQ</sup> $\Delta\Delta$*  knockout mice appeared normal in size, weight and  
6 adiposity compared to controls at adult stages (Fig. 4A). They were modestly smaller  
7 at 5 months (Fig. 4B). Accordantly, the thermogenic program in the BAT of  
8 *Foxp4<sup>AdipQ</sup> $\Delta\Delta$*  mice did not appear to be activated at ambient temperature (20-22°C), as  
9 indicated by H&E staining and IHC, as well as by qPCR analysis of a set of thermogenic  
10 marker transcripts (Supplementary Fig. S3C, D). Indirect calorimetry analysis by  
11 CLAMS revealed that *Foxp4* loss had no impact on O<sub>2</sub> or CO<sub>2</sub> consumption, as well as  
12 on energy expenditure following identical diet and locomotor activity as controls at  
13 20~22 °C (Supplementary Fig. S4). In contrast, thermogenic activation of beige  
14 adipocytes was mildly exacerbated in sWAT of *Foxp4<sup>AdipQ</sup> $\Delta\Delta$*  mice, as evidenced by  
15 relatively enriched levels of UCP1<sup>+</sup> adipocytes and by upregulation of thermogenic or  
16 mitochondrial signature genes (*PPAR $\gamma$* , *Dio2*, *Cidea*, *Ucp1*, *Cox2*, *Cox4il*, *Cox5b*,  
17 *Cox8b*) (Fig. 4C, D). We conclude from these analyses that loss of FOXP4 results in  
18 modest augmentation of thermogenesis in beige adipocytes at ambient temperature.

19

## 20 ***Foxp4* deficiency protects mice from HFD-induced obesity**

21 Beige adipocyte thermogenesis could combat obesity in human (Lidell et al., 2013) .  
22 To examine the impact of *Foxp4* deficiency on long-term adipose tissue metabolism,  
23 mice were fed with HFD for three months. We observed that *Foxp4<sup>AdipQ</sup> $\Delta\Delta$*  mice were  
24 leaner in body, with fewer adipose depots (Supplementary Fig. S4A, B), and gained  
25 less body weight and adiposity than littermates after 12-week HFD feeding starting at  
26 ages of 2 months (Supplementary Fig. S4C). *Foxp4<sup>AdipQ</sup> $\Delta\Delta$*  mutant mice also retained  
27 more efficient glucose tolerance following HFD feeding, as evidenced by GTT scores  
28 (Supplementary Fig. S4D). Of note, as aforementioned, UCP1-mediated beige  
29 thermogenesis was mildly mitigated in *Foxp4<sup>AdipQ</sup> $\Delta\Delta$*  mutant mice at room temperature  
30 (Fig. 3C, D and Fig. 4C, D), which may undermine the effect that *Foxp4*-deficiency



1 protects from HFD-induced obesity.

2

### 3 **FOXP4 suppresses beige adipocyte thermogenesis cell-autonomously**

4 To examine a potential cell-autonomous effect of FOXP4 on beige adipocyte energy  
5 metabolism, SVF cells were isolated from sWAT depots of *Foxp4<sup>AdipQ</sup> $\Delta/\Delta$*  and control  
6 mice and then induced for beige adipocyte differentiation *in vitro*. We observed  
7 advanced beige adipocyte thermogenesis in *Foxp4*-deficient SVF progenitors, as  
8 evaluated by elevated mRNA levels of a set of thermogenic genes (*Cidea*, *Dio2*, *Elovl3*,  
9 *PGC-1 $\alpha$* , *Ucp1*, *Cox2*, *Cox7a1*, *Cox5b*, *Cox8b*) (Fig. 4E, F). In addition, oxygen  
10 consumption rates (OCR) of beige adipocytes from *Foxp4<sup>AdipQ</sup> $\Delta/\Delta$*  mutant mice exhibited  
11 higher total and uncoupled OCR as compared to controls (Fig. 4G, H). These results  
12 indicated that loss of FOXP4 led to elevated mitochondrial respiration. The  
13 thermogenic potency of SVF-derived brown adipocyte also was potentiated in *Foxp4*-  
14 deficient mice, as evidenced by qPCR and OCR analyses (Supplementary Fig. S3E-H).  
15 This line of evidence indicated that FOXP4 suppresses beige adipocyte thermogenesis  
16 in a cell-autonomous manner.

17

### 18 ***Foxp4* depletion exacerbates cold-induced beige adipocyte thermogenesis *in vivo***

19 We demonstrated that beige adipocytes could be mildly activated within sWAT under  
20 room temperature at adult stage. Then we examined beige adipocyte thermogenesis and  
21 activation in *Foxp4<sup>AdipQ</sup> $\Delta/\Delta$*  mice under cold conditions. As compared to controls, *Foxp4*  
22 knockout mice had relatively higher rectal temperature during 6-hour 4°C exposure  
23 (Fig. 5A). *Foxp4<sup>AdipQ</sup> $\Delta/\Delta$*  mice also displayed a “browning” feature of sWAT after one-  
24 week at 4°C (Fig. 5B). This result was consistent with H&E staining and IHC results  
25 demonstrating higher levels of UCP1<sup>+</sup> beige adipocytes (Fig. 5C). Elevated beige  
26 adipocyte thermogenesis was validated by RT-qPCR analysis of signature genes (*Cidea*,  
27 *Dio2*, *Elovl3*, *PGC-1 $\alpha$* , *Ucp1*, *Cox2*, *Cox5b*, *Cox8b*) (Fig. 5D). Consistent with these  
28 observations, transmission electronic microscopic (TEM) and qPCR analyses revealed  
29 relative enrichment of mitochondria within beige adipocytes of *Foxp4<sup>AdipQ</sup> $\Delta/\Delta$*  sWAT  
30 (Fig. 5F, G). Yet long-term cold exposure had no significant effect on beige adipocyte

1 *de novo* biogenesis in mutant mice, as evidenced by transcript levels of beige signature  
2 genes (*Klh13*, *Sl27a1*, *Tbx1*, *CD137*) (Fig. 5E). We further observed that cold exposure  
3 had little effect on thermogenesis in the BAT of *Foxp4<sup>AdipQ</sup><sup>Δ/Δ</sup>* mice (Supplementary Fig.  
4 S6). Together, these results suggested that FOXP4 acts as a repressor of the  
5 thermogenic gene program in beige adipocytes.

6 Thermogenesis of beige adipocytes could also be activated through adrenergic  
7 signaling (Jiang et al., 2017). However, when treated with 7-day consecutive injection  
8 of the  $\beta$ 3-AR agonist, CL-316,243, *Foxp4<sup>AdipQ</sup><sup>Δ/Δ</sup>* mice exhibited no evident activation  
9 of thermogenic program nor no increase in beige adipocyte biogenesis, as determined  
10 by H&E staining, IHC and RT-qPCR analyses (Supplementary Fig. S7). These findings  
11 suggested that FOXP4 controls cold-induced beige adipocyte activation through  
12 adrenergic-independent signaling.

13

#### 14 **FOXP4 attenuates beige adipocyte thermogenesis by directly repressing *Pgc1 $\alpha$*** 15 **and *Cebp $\beta$* transcription**

16 To explore the molecular mechanism underlying the impact of FOXP4 on beige  
17 adipocyte thermogenesis and activation, RNA-seq analysis were performed on beige  
18 adipocytes derived from sWAT-SVF of *Foxp4<sup>AdipQ</sup><sup>Δ/Δ</sup>* mice. As shown in Fig. 6A and  
19 B, expressions of an array of thermogenic or mitochondrial gene markers were elevated  
20 in *Foxp4*-deficient beige adipocytes. Next, we conducted ChIP-seq analysis of SVF-  
21 induced beige adipocytes by employing anti-FOXP4 and Anti-H3K27Ac antibodies for  
22 pulldowns. As shown in Fig. 6B, 5 common target genes were detected by both RNA-  
23 seq and ChIP-seq, including the classical thermogenic genes, *Pgc1 $\alpha$*  and *Cebp $\beta$* .  
24 Western blotting confirmed the up-regulation of PGC1 $\alpha$ , Cebp $\beta$  and UCP1 at the  
25 protein levels under conditions of decreased FOXP4 (Fig. 6C). Promoter occupancy as  
26 determined by ChIP-seq validated the relative enrichment of FOXP4 binding sites  
27 within the chromatin of *Pgc1 $\alpha$*  and *Cebp $\beta$*  upstream promoter regions (arrows in Fig.  
28 6D). In support, reporter assays employing a *Pgc1 $\alpha$*  promoter-driven luciferase vector  
29 revealed that FOXP4 repressed the transactivation ability of PPAR $\gamma$  in 3T3-L1 cells  
30 (Fig. 6E). These findings demonstrated that FOXP4 restrained beige adipocyte

1 thermogenic activation by directly repressing *Pgc1 $\alpha$*  and *Cebp $\beta$*  gene transcription.

2

### 3 **DISCUSSION**

4 Beige fat cells harbor distinctive molecular signatures from white and brown adipocytes  
5 during development. Once committed from progenitor cells, differentiated beige  
6 adipocytes demonstrate a plastic morphology that is tightly coupled with their  
7 reversible thermogenic potency. In this study, we dissected the phase-specific role of  
8 transcription factor FOXP4 in beige fat cell differentiation and thermogenesis. *Foxp4*  
9 deletion impaired the cell fate commitment of beige adipocytes from progenitor cells,  
10 but exacerbated cold-induced thermogenesis in differentiated beige adipocytes. Our  
11 findings indicate that FOXP4 primes beige cell differentiation, but acts as a “brake” for  
12 beige adipocyte thermogenesis under cold challenge (Fig. 6F).

13 To evaluate the impact of FOXP4 on beige cell differentiation, two independent  
14 knockout models were employed in our study. At the adult stage, the majority of cold-  
15 induced beige adipocytes arise from mural progenitor cells within vascular  
16 compartments of WAT (Long et al., 2014; Shamsi et al., 2021). It was previously shown  
17 that *SMA-Cre<sup>ERT</sup>* mice could account for ~60% of cold-induced beige adipocytes (Berry  
18 et al., 2016). In our first model, tamoxifen-inducible, Cre-mediated recombination was  
19 used to delete *Foxp4* in SMA<sup>+</sup> SVF cells prior to beige adipocyte differentiation. Aside  
20 from SMA<sup>+</sup> beige precursors, WAT-SVF cells contain another subset of PDGFR $\alpha$ -  
21 positive beige progenitor cells (Lee et al., 2012; Wang et al., 2013). As our second  
22 model we employed *pMSCV-Cre* to delete *Foxp4* in all beige precursor cells. Defective  
23 beige adipogenesis, as well as pro-fibrotic cell potency, was observed in progenitor cells  
24 with *Foxp4* deficiency. Of note, no defects of white adipocyte differentiation were  
25 observed at loss of *Foxp4* by *pMSCV-Cre* (Supplementary Fig. S2. E, F). These  
26 experiments provided compelling evidence demonstrating that FOXP4 was required for  
27 beige cell fate determination and differentiation.

28 PDGFR $\alpha$ -positive progenitor cells within sWAT harbor multiple potency in cell  
29 differentiation. They are precursor cells for both white and beige adipocytes (Gao et al.,  
30 2018), as well as for fibroblasts (Cattaneo et al., 2020). PDGFR $\alpha$ -positive progenitors

1 are prone to give rise to beige adipocytes in response to  $\beta$ 3-adrenoceptor activation and  
2 high-fat diet (Lee et al., 2012), rather than to cold induction (Berry et al., 2016; Shin et  
3 al., 2020). In addition, PDGFR $\alpha$  expression levels seem to be precisely controlled  
4 during adipogenesis. PDGFR $\alpha$  expression precedes beige adipocyte differentiation  
5 (Gao et al., 2018). Its continuous expression or activation in sequential phases drive  
6 progenitor cells toward fibroblastic cell fate (Iwayama et al., 2015; Marcelin et al., 2017;  
7 Sun et al., 2017). In line with those findings, *Foxp4*-deficient SVF cells display fibrotic  
8 signatures, due to increase and continuous *Pdgfra* expression. When combined with  
9 our ChIP-seq and luciferase reporter data, the evidence suggests that FOXP4 primes a  
10 progenitor cell fate switch towards the beige adipocyte lineage, partially through  
11 modulating *Pdgfra* expression levels.

12 Prior to the present report, only a few beige-selective transcription factors have  
13 been characterized, including MRTFA (McDonald et al., 2015) and Tbx1 (Wu et al.,  
14 2012). FOXP4 is expressed in both BAT and sWAT of mice. But our genetic analysis  
15 showed that deletion of *Foxp4* in adipocytes had little effect on *in vivo* BAT  
16 development and thermogenesis. Only oxygen consumption and expression of several  
17 thermogenic marker genes were slightly exacerbated in *in vitro* cultures of SVF-derived  
18 brown adipocytes from *Foxp4*-deficient mice. Upon cold exposure and adrenoceptor  
19 agonist stimulation, we observed no significant differences *in vivo* in BAT  
20 thermogenesis. Its dynamic expression level in beige adipocytes during cell  
21 differentiation and cold exposure suggests that FOXP4 is a selective regulator of beige  
22 adipocyte development and cold-induced thermogenesis.

23 The thermogenic program of beige adipocytes can be activated through various  
24 pathways (Barbatelli et al., 2010; Rosenwald et al., 2013). Most beige adipocytes are  
25 activated through the  $\beta$ 3-adrenergic signaling pathway (Lee et al., 2015). However, it  
26 also was reported that cold-induced activation of beige adipocytes requires the  $\beta$ 1  
27 adrenergic receptor (*Adrb1*), but not the  $\beta$ 3 adrenergic receptor (*Adrb3*) (Jiang et al.,  
28 2017). Recently, a glycolytic beige population was identified that could be induced by  
29 chronic cold adaptation in the absence of  $\beta$ -adrenergic receptor signaling (Chen et al.,  
30 2019). Excess calorie intake also can trigger the activation of CHRNA2-dependent

1 beige adipocytes (Jun et al., 2020), which also are glycolytic and  $\beta$ -adrenergic signaling  
2 independent. Interestingly, *Foxp4*-inactivated beige adipocytes appeared to only react  
3 to cold exposure, not to an adrenoceptor agonist (Supplementary Fig. S7C, D), and had  
4 elevated expressions of glycolytic marker genes as compared to controls in response to  
5 cold exposure (Supplementary Fig. S6C, D). This suggested that FOXP4 controls beige  
6 cell thermogenic activation through an adrenergic signaling-independent pathway,  
7 maybe partially through glycolytic pathway.

8 A recent report pointed out that different transcriptional machinery governs beige  
9 adipocyte development and activation between peri-weaning and adult stages (Wu et  
10 al., 2020). However, we observed that inactivation of *Foxp4* only slightly exacerbated  
11 UCP1-mediated thermogenesis at both periods. Thus, we suggest that FOXP4 is shared  
12 as a regulator of arresting thermogenesis in both juvenile and mature beige adipocytes.  
13 This view is consistent with previous studies from our laboratory that showed that  
14 FOXP1, a highly conserved paralogue of FOXP4, repressed both beige adipocyte  
15 differentiation and UCP1-mediated thermogenesis (Liu et al., 2019). Given that FOXP1  
16 and FOXP4 form dimers in various tissues (Li et al., 2012; Li et al., 2004; Sin et al.,  
17 2015), we cannot exclude the potentially cooperative function of FOXP1/4 in  
18 controlling beige cell thermogenesis.

19 Collectively, the data presented in this report reveal a selective role of FOXP4 in  
20 beige adipocytes differentiation and cold-induced thermogenesis. We suggest that a  
21 more thorough understanding of the underlying causes of FOXP4 selective function  
22 will allow us to specifically manipulate beige cells to improve systemic energy  
23 metabolism and to combat obesity.

24

## 25 MATERIAL AND METHODS

### 26 Mice

27 The *Foxp4*<sup>fl/fl</sup> constructed by our lab has been described in previous studies (Zhao et al.,  
28 2015). *Adiponectin-Cre* (Stock no. 028020 in Jax Lab) was obtained from Jax lab. *SMA-*  
29 *CreERT* mice was kindly provided by Prof. Gang Ma in Shanghai Jiaotong University.  
30 The genetic backgrounds of all knockout mice were C57Bl/6J. Mice were bred with

1 standard rodent chow food or HFD. For cold treatment, mice were bred under 4 °C  
2 environment for a week. For continuous  $\beta$ -adrenergic stimulation, mice were  
3 intraperitoneal injected CL-316,243(0.75 mg/kg) for up to 7 days. Male mice were used  
4 in the experiments unless otherwise indicated. The experiments were not randomized,  
5 and the investigators were not blinded to allocation during experiments or outcome  
6 assessments. Mice are maintained under a constant environmental temperature (22 °C)  
7 and a 12-h light/12-h dark cycle. All animal experiments were performed according to  
8 the guidelines of Shanghai Jiao Tong University (SYXK 2011-0112).

9

### 10 **Metabolic study**

11 Minispec TD-NMR Analysers (Bruker Instruments) were used to evaluate adiposity  
12 composition on anesthetized animals. Food intake, energy expenditure, O<sub>2</sub>  
13 consumption, CO<sub>2</sub> production and physical activity were measured by using indirect  
14 calorimetry system (Oxymax, Columbus Instruments), installed under a constant  
15 environmental temperature (22 °C) and a 12-h light (07:00 – 19:00 hours), 12-h dark  
16 cycle (19:00 – 07:00 hours). Mice in each chamber had free access to food and water.  
17 The raw data were normalized by body weight and the histograms of day (07:00-19:00  
18 hours) and night (19:00 – 07:00 hours) values were the mean value of all points  
19 measured during the 12-h period.

20

### 21 **Immunohistochemistry and TEM**

22 Adipose tissues were fixed in 4% PFA for 16 hours at 4 °C, embedded in paraffin or  
23 tissue freezing medium (Leica) and sectioned to 4  $\mu$ m. H&E staining was conducted  
24 according to standard protocols. For immunofluorescence, heat-induced antigen  
25 retrieval with sodium citrate buffer (10mM sodium citrate, 0.05% Tween 20, pH 6.0)  
26 was performed before sections were blocked with 5% BSA in TBST (pH 7.6) for 30  
27 minutes at 37 °C, then incubated overnight at 4 °C with primary antibodies to mouse  
28 Foxp4 (Millipore, #ABE74, 1:100), UCP1 (Abcam, #ab10893, 1: 100). Subsequently,  
29 sections were incubated with secondary fluorescent-conjugated or HRP-conjugated

1 antibodies at 37°C for 30 minutes in the dark. Samples were imaged by the Leica TCS  
2 SP5 confocal microscope, Leica DM2500, or Leica 3000B microscope. Transmission  
3 electron microscopy (TEM) of beige adipose tissue was carried out in accordance with  
4 a previous study (Liu et al., 2019).

5

## 6 **Cell cultures**

7 For SVF cell isolation, primary BAT and sWAT were digested with  
8 1 mg ml<sup>-1</sup> collagenase type I (Sigma) in DMEM (Invitrogen) supplemented with 1%  
9 bovine serum albumin for 25 min at 37 °C, followed by filtration, density separation  
10 with centrifugation. The freshly isolated SVF cells were seeded and cultured in growth  
11 medium containing DMEM, 20% FBS, 1% penicillin/streptomycin (P/S) at 37 °C with  
12 5% CO<sub>2</sub> for 3 days, followed by feeding with fresh medium every 2 days to reach  
13 confluence. For brown/beige adipocyte differentiation, the cells were induced with  
14 induction medium contains DMEM, 10% FBS, 5 µg ml<sup>-1</sup> insulin, 0.5 mM  
15 isobutylmethylxanthine (Sigma), 1 µM dexamethasone (Sigma), 50 nM T3 (Sigma)  
16 and 5 µM troglitazone (Sigma) for 48 hours, and further in growth medium  
17 supplemented with insulin, T3 and troglitazone for 6 days, followed by 0.5 mM cyclic  
18 AMP (Sigma) treatment for another 4 hours. For inducible knockout in beige cells,  
19 SVF from *Foxp4*<sub>SMA</sub><sup>ErtΔ/A</sup> and *Foxp4*<sup>fl/fl</sup> mice were expanded for 2 days with growth  
20 medium, treated with tamoxifen in cultures for 24 hours with final concentration 1nM.  
21 followed by 6-day differentiation cultures without tamoxifen. HEK293T (ATCC) were  
22 cultured in DMEM with 10% FBS. For oil red staining, cultured cells were washed with  
23 PBS and fixed with 10% formaldehyde for 15 min at room temperature. Then the cells  
24 were stained using the Oil red O working solutions (5g/l in isopropanol) and 4 ml H<sub>2</sub>O  
25 for 30 min. After staining, the cells were washed with 60% isopropanol and pictured.

26

## 27 **FACS analysis**

28 2-month-old *Foxp4* knockout mice by *SMA-CreERT* were interperitoneally injected  
29 once with tamoxifen dissolved in sunflower oil (Sigma, 100 mg/kg). After 48 hours,  
30 SVF cells were isolated from mice euthanized with CO<sub>2</sub> according to protocols showed



1 above. Progenitor cells from SVF were expanded for two days in growth cultures and  
2 treated with tamoxifen (a final concentration of 1 nM) for 24 hours. Then those cells  
3 were treated with fresh cultures without tamoxifen for another 24 hours before being  
4 collected for FACS analysis. Tamoxifen-administrated SVF cells were suspended with  
5 FACS buffer to a final concentration of  $10^5$ - $10^6$  cells/100uL, incubated on ice for 30~45  
6 minutes with antibody combinations of PerCP-CD45 (BioLegend, #103131), PerCP-  
7 CD31 (BioLegend, #102419), APC-Sca-1 (BioLegend, #122511), PE-CD140 $\alpha$   
8 (BioLegend, #135905), CD24-FIFC (BioLegend, #101815). The cells then washed  
9 twice with PBS before analysis on BD Calibur. Proportion of adipocyte progenitors  
10 were analyzed with Flowjo V10 software.

11

### 12 **Oxygen consumption assay**

13 Primary SVF cells from BAT and sWAT were isolated and cultured for 4 days before  
14 being plated in XF cell culture microplates (Seahorse Bioscience). SVF cells (10,000  
15 cells) were seeded in each well, and each treatment included cells from three BAT or  
16 sWAT replicates. After 6-day differentiation, cultured adipocytes were washed twice  
17 and pre-incubated in XF medium (supplemented with 25mM glucose, 2mM glutamine  
18 and 1mM pyruvate) for 1–2 h at 37 °C without CO<sub>2</sub>. The OCR was measured using  
19 the XF Extracellular Flux Analyser (Seahorse Biosciences). Oligomycin (2 mM), FCCP  
20 (2 mM), and Antimycin A (0.5 mM) were preloaded into cartridges and injected into  
21 XF wells in succession. OCR was calculated as a function of time (pmoles per minute  
22 per  $\mu$ g protein).

23

### 24 **Luciferase assay**

25 Luciferase assays were performed in HEK293T or 3T3-L1 cells. The reporter plasmid,  
26 *Pgcl $\alpha$ -Luc* containing a 2.6 kb fragment of the promotor region of the *Pgcl $\alpha$*  gene,  
27 was obtained from Dr. JiQiu Wang of the Ruijin hospital (Shanghai, China). *Pdgfr $\alpha$ -Luc*  
28 plasmid containing 1.3 kb of the 5' flanking region of *PDGFR $\alpha$*  gene was constructed  
29 by our lab. The primers used for amplification are shown in Table S1. The expression  
30 plasmids of *Foxp4* and *Ppar $\gamma$*  were constructed into the pcDNA3.0 vector. Cells were

1 transfected using FuGENE HD (Promega) in 24-well plates. The transfection amount  
2 of each plasmid was 200 ng, and the total amount of transfected DNA across each  
3 transfection was balanced by pcDNA3.0 plasmids when necessary. After 36 hours, dual  
4 luciferase assay was performed according to the manufacturer's protocols (Promega).

5

## 6 **RNA isolation and quantitative RT-PCR**

7 We used TRIzol (Vazyme, #R401) and for total RNA extraction, respectively,  
8 according to the manufacturers' instructions. Extracted RNA (1 $\mu$ g) was converted into  
9 cDNA using the HiScript<sup>®</sup> III SuperMix for qPCR (Vazyme,R323-01). Quantitative  
10 RT-PCR (qRT-PCR) was performed using an LightCycler<sup>®</sup> 480 II (Roche) and SYBR  
11 Green PCR Master Mix (Vazyme, #Q711-02). Fold change was determined by  
12 comparing target gene expression with the reference gene  $\beta$ -actin. The primers used for  
13 qRT-PCR are shown in Table S1. For RNA-seq, total RNA extracted from sWAT with  
14 TRIzol was used for library construction and RNA sequencing (Personal  
15 Biotechnology Co., Ltd, Shanghai, China).

16

## 17 **Western blot**

18 For western blotting, adipose tissue was homogenated and lysed with RIPA (Beyotime,  
19 P0013B). Protein samples were incubated with primary antibodies against Foxp4  
20 (Millipore, #ABE74, 1:1000), Ucp1 (Abcam, #ab10893, 1: 1000), C/ebp $\beta$  (Santa Cruz,  
21 #sc-150, 1:500), PGC1 $\alpha$  (Abways, #CY6630,1:1000),  $\beta$ -actin (Selleck, #A1016,  
22 1:2000) at 4 $^{\circ}$ C overnight. Proteins were visualized using HRP-conjugated secondary  
23 antibody and chemiluminescent HRP substrate (Millipore).

24

## 25 **ChIP-Seq**

26 Wash 20 $\mu$ l Magna ChIP<sup>™</sup> Protein A+G Magnetic Beads (Millipore, 16-663) twice with  
27 1 ml FA buffer (10mM HEPES[PH7.5],150mM NaCl, 1mM EDTA, 1% TritonX-100,  
28 0.1% Sodium deoxycholate, 0.1% SDS and protease inhibitors). Then suspend the beads  
29 with 1 ml FA buffer, add 4 $\mu$ g antibody to the beads and rotate for at least 2 hours.  
30 Differentiated SVF cells were cross-linked using 1% formaldehyde in PBS at room

1 temperature with rotation. Cells were then incubated with 125mM Glycine (Sangon,  
2 #A610235-0500) (62.5ul 2M Glycine/ml PBS) at room temperature for 10 minutes to  
3 stop cross-linking. After washed twice with ice-cold PBS, cells were collected and  
4 diluted in 0.5 ml FA buffer. Sonication the cells by sonics CV130 with the parameter:  
5 5s on;10s off; 6 minutes to make the DNA fragment at 300-500bp. Centrifuge the  
6 sonicated solution at 13,000 rpm for 5 minutes to Collect the supernatant. Wash the  
7 beads bounded with antibody twice with FA buffer. Add antibody coated beads into the  
8 sonicated supernatant for 12-16 hours at 4°C with rotation. Wash the beads sequential  
9 with FA buffer once , high salt buffer (10mM HEPES[PH7.5], 150mM NaCl, 1mM  
10 EDTA, 1% TritonX-100, 0.1%Sodiumdeoxycholate, 0.1%SDS), LiCl buffer (10mM  
11 Tris-HCl[PH8.0], 0.25M LiCl, 1% NP-40, 1mM EDTA, 0.1%Sodiumdeoxycholate)  
12 and TE buffer (10mM Tris-HCl[PH7.5], 1mM EDTA) twice. Suspend the beads with  
13 270ul Elution buffer (50mM Tris-HCl[PH7.5], 1mM EDTA, 1% SDS) and elute it with  
14 68°C, 900 rpm for 30minutes on an eppendorf thermoMixer. After elution, add 130 µl  
15 TE buffer, 3 µl Rnase A (Thermo fisher, EN0531) into the eluate, incubate at 37°C for  
16 30minutes. Then add 5ul Proteinase K (Thermo fisher, #AM2546),incubate at 65°C  
17 overnight to reverse cross-links. DNA was isolated and purified with a ZYMO DNA  
18 clean & Concentrator (ZYMO RESEARCH, #D4013).

19 Libraries were constructed using an VAHTS Universal DNA Library Prep Kit for  
20 Illumina® V3(Vazyme, #ND607) according to the manual protocol. Isolated Chip DNA  
21 was sequential subjected to end repair/phosphorylation/A-tailing adding, and index  
22 adaptor ligation. AMPure XP beads (Beckman Coulter, #A63880) were used for a post-  
23 ligation cleanup, DNA was eluted from beads and amplified by PCR for 10 cycles.  
24 DNA sized between 200 and 700bp was selected by a double-sided size selection  
25 strategy with AMPure XP beads. After elution with 10mM Tris[PH8.0], libraries were  
26 analyzed using the Qubit and Agilent 2100 Bioanalyzer, pooled at a final concentration  
27 of 12pM and sequenced on a HiSeq2500. For ChIP-seq analysis, demultiplexed ChIP-  
28 seq reads were aligned to the mm10 mouse genome using Bowtie2 (45) with the  
29 parameter "--no-discordant --no-unal --no-mixed". PCR duplicates and low-quality  
30 reads were removed by Picard. Reads were processed using Samtools (46)and subjected

1 to peak-calling with MACS2 (47) with a parameter “except -f BAMPE -p 0.01”. We  
2 convert the bam file to bw file using deeptools (v3.3.0). Integrative Genomics Viewer  
3 (IGV, v2.7.2) was used for peak visualization. Overlaps between Chip-seq and RNA-  
4 seq were performed and we draw the venn diagram in R.

5

## 6 **Glucose tolerance test (GTT)**

7 For GTT, mice were given i.p. injection of 100 mg/ml D-glucose (2 g/kg body weight)  
8 after overnight fasting, and tail blood glucose concentrations were measured by a  
9 glucometer (AccuCheck Active, Roche).

10

## 11 **Data analysis**

12 For RNA-seq analysis, sequencing reads were filtered using Cutadapt and aligned to  
13 the mm10 mouse genome using HISAT2 (Kim et al., 2015). Filtered reads were  
14 assigned to the annotated transcriptome and quantified using HTSeq (Anders et al.,  
15 2015), FPKM was used as normalization method. The analysis below was all performed  
16 in R. We used DEseq Package for differential expression analysis (Anders and Huber,  
17 2010). Genes were considered significant if they passed a fold change (FC) cutoff of  
18  $|\log_2FC| > 1$  and a false discovery rate (FDR) cutoff of  $FDR\% < 0.05$ . Heatmap package  
19 was used for gene expression cluster analysis and heatmap visualization. We used  
20 topGO for GO analysis (Alexa et al., 2006). Clusterprofiler package was used for  
21 KEGG and GSEA analysis with default parameter (Yu et al., 2012).

22 For statistical analysis, all data are presented as mean  $\pm$  SD. Error bars are SD.  
23 Two-tailed Student's t-tests for comparisons between two groups and two-way ANOVA  
24 for that more than two groups.

25

## 26 **ACKNOWLEDGEMENT**

27 This work was supported by research grants from the National Natural Science  
28 Foundation of China [92068203, 91749103, 81421061, 31100624 and 81200586] and  
29 grant from the National Major Fundamental Research 973 Program of China

1 [2020YFA0803601, 2014CB942902] to X.G. Great thanks for Prof. Haley O. Tucker  
2 from University of Texas in manuscript editing.

3

#### 4 **AUTHOR CONTRIBUTIONS.**

5 F.W., S.X., T. C., W.Z., S.L, S. W., R. Z., X.X. performed experiments, X.G. designed  
6 experiments, P. L., X.Z., Z.Y. and J.W. helped preparing samples and instructing  
7 experiments, X.G. wrote manuscript.

8

#### 9 **DECLARATION OF INTEREST.**

10 No potential conflicts of interest relevant to this article were reported.

11

#### 12 **DATA AND RESOURCE AVAILABILITY**

13 The data sets generated during and/or analyzed during the current study are available  
14 from the corresponding author upon reasonable request. The resources generated during  
15 and/or analyzed during the current study are available from the corresponding author  
16 upon reasonable request.

17

#### 18 **References**

- 19 **Alexa, A., Rahnenfuhrer, J. and Lengauer, T.** (2006). Improved scoring of functional groups from gene  
20 expression data by decorrelating GO graph structure. *Bioinformatics* **22**, 1600-1607.
- 21 **Altshuler-Keylin, S., Shinoda, K., Hasegawa, Y., Ikeda, K., Hong, H., Kang, Q., Yang, Y., Perera, R. M.,**  
22 **Debnath, J. and Kajimura, S.** (2016). Beige Adipocyte Maintenance Is Regulated by Autophagy-Induced  
23 Mitochondrial Clearance. *Cell Metab* **24**, 402-419.
- 24 **Anders, S. and Huber, W.** (2010). Differential expression analysis for sequence count data. *Genome*  
25 *Biology* **11**.
- 26 **Anders, S., Pyl, P. T. and Huber, W.** (2015). HTSeq-a Python framework to work with high-throughput  
27 sequencing data. *Bioinformatics* **31**, 166-169.
- 28 **Barbatelli, G., Murano, I., Madsen, L., Hao, Q., Jimenez, M., Kristiansen, K., Giacobino, J. P., De Matteis,**  
29 **R. and Cinti, S.** (2010). The emergence of cold-induced brown adipocytes in mouse white fat depots is  
30 determined predominantly by white to brown adipocyte transdifferentiation. *Am J Physiol Endocrinol*  
31 *Metab* **298**, E1244-53.
- 32 **Berry, D. C., Jiang, Y. and Graff, J. M.** (2016). Mouse strains to study cold-inducible beige progenitors  
33 and beige adipocyte formation and function. *Nat Commun* **7**, 10184.
- 34 **Berry, R. and Rodeheffer, M. S.** (2013). Characterization of the adipocyte cellular lineage in vivo. *Nat*

- 1 *Cell Biol* **15**, 302-8.
- 2 **Cattaneo, P., Mukherjee, D., Spinozzi, S., Zhang, L., Larcher, V., Stallcup, W. B., Kataoka, H., Chen, J.,**  
3 **Dimmeler, S., Evans, S. M. et al.** (2020). Parallel Lineage-Tracing Studies Establish Fibroblasts as the  
4 Prevailing In Vivo Adipocyte Progenitor. *Cell Rep* **30**, 571-582 e2.
- 5 **Chen, Y., Ikeda, K., Yoneshiro, T., Scaramozza, A., Tajima, K., Wang, Q., Kim, K., Shinoda, K., Sponton,**  
6 **C. H., Brown, Z. et al.** (2019). Thermal stress induces glycolytic beige fat formation via a myogenic state.  
7 *Nature* **565**, 180-185.
- 8 **Eguchi, J., Wang, X., Yu, S., Kershaw, E. E., Chiu, P. C., Dushay, J., Estall, J. L., Klein, U., Maratos-Flier, E.**  
9 **and Rosen, E. D.** (2011). Transcriptional control of adipose lipid handling by IRF4. *Cell Metab* **13**, 249-  
10 59.
- 11 **Gao, Z., Daquinag, A. C., Su, F., Snyder, B. and Kolonin, M. G.** (2018). PDGFRalpha/PDGFRbeta signaling  
12 balance modulates progenitor cell differentiation into white and beige adipocytes. *Development* **145**.
- 13 **Han, X., Zhang, Z., He, L., Zhu, H., Li, Y., Pu, W., Han, M., Zhao, H., Liu, K., Huang, X. et al.** (2021). A  
14 suite of new Dre recombinase drivers markedly expands the ability to perform intersectional genetic  
15 targeting. *Cell Stem Cell*.
- 16 **Iwayama, T., Steele, C., Yao, L., Dozmorov, M. G., Karamichos, D., Wren, J. D. and Olson, L. E.** (2015).  
17 PDGFRalpha signaling drives adipose tissue fibrosis by targeting progenitor cell plasticity. *Genes Dev* **29**,  
18 1106-19.
- 19 **Jiang, Y., Berry, D. C. and Graff, J. M.** (2017). Distinct cellular and molecular mechanisms for beta3  
20 adrenergic receptor-induced beige adipocyte formation. *Elife* **6**.
- 21 **Jun, H., Ma, Y., Chen, Y., Gong, J., Liu, S., Wang, J., Knights, A. J., Qiao, X., Emont, M. P., Xu, X. Z. S. et**  
22 **al.** (2020). Adrenergic-Independent Signaling via CHRNA2 Regulates Beige Fat Activation. *Dev Cell* **54**,  
23 106-116 e5.
- 24 **Kim, D., Landmead, B. and Salzberg, S. L.** (2015). HISAT: a fast spliced aligner with low memory  
25 requirements. *Nature Methods* **12**, 357-U121.
- 26 **Lee, Y. H., Petkova, A. P., Konkar, A. A. and Granneman, J. G.** (2015). Cellular origins of cold-induced  
27 brown adipocytes in adult mice. *FASEB J* **29**, 286-99.
- 28 **Lee, Y. H., Petkova, A. P., Mottillo, E. P. and Granneman, J. G.** (2012). In vivo identification of bipotential  
29 adipocyte progenitors recruited by beta3-adrenoceptor activation and high-fat feeding. *Cell Metab* **15**,  
30 480-91.
- 31 **Li, S., Wang, Y., Zhang, Y., Lu, M. M., DeMayo, F. J., Dekker, J. D., Tucker, P. W. and Morrisey, E. E.** (2012).  
32 Foxp1/4 control epithelial cell fate during lung development and regeneration through regulation of  
33 anterior gradient 2. *Development* **139**, 2500-9.
- 34 **Li, S., Weidenfeld, J. and Morrisey, E. E.** (2004). Transcriptional and DNA binding activity of the  
35 Foxp1/2/4 family is modulated by heterotypic and homotypic protein interactions. *Mol Cell Biol* **24**, 809-  
36 22.
- 37 **Lidell, M. E., Betz, M. J., Dahlqvist Leinhard, O., Heglind, M., Elander, L., Slawik, M., Mussack, T.,**  
38 **Nilsson, D., Romu, T., Nuutila, P. et al.** (2013). Evidence for two types of brown adipose tissue in humans.  
39 *Nat Med* **19**, 631-4.
- 40 **Liu, P., Huang, S., Ling, S., Xu, S., Wang, F., Zhang, W., Zhou, R., He, L., Xia, X., Yao, Z. et al.** (2019).  
41 Foxp1 controls brown/beige adipocyte differentiation and thermogenesis through regulating beta3-AR  
42 desensitization. *Nat Commun* **10**, 5070.
- 43 **Long, J. Z., Svensson, K. J., Tsai, L., Zeng, X., Roh, H. C., Kong, X., Rao, R. R., Lou, J., Lokurkar, I., Baur,**  
44 **W. et al.** (2014). A smooth muscle-like origin for beige adipocytes. *Cell Metab* **19**, 810-20.



- 1 **Ma, T. and Zhang, J.** (2019). Upregulation of FOXP4 in breast cancer promotes migration and invasion  
2 through facilitating EMT. *Cancer Manag Res* **11**, 2783-2793.
- 3 **Marcelin, G., Ferreira, A., Liu, Y., Atlan, M., Aron-Wisnewsky, J., Pelloux, V., Botbol, Y., Ambrosini, M.,  
4 Fradet, M., Rouault, C. et al.** (2017). A PDGFRalpha-Mediated Switch toward CD9(high) Adipocyte  
5 Progenitors Controls Obesity-Induced Adipose Tissue Fibrosis. *Cell Metab* **25**, 673-685.
- 6 **McDonald, M. E., Li, C., Bian, H., Smith, B. D., Layne, M. D. and Farmer, S. R.** (2015). Myocardin-related  
7 transcription factor A regulates conversion of progenitors to beige adipocytes. *Cell* **160**, 105-18.
- 8 **Oguri, Y., Shinoda, K., Kim, H., Alba, D. L., Bolus, W. R., Wang, Q., Brown, Z., Pradhan, R. N., Tajima, K.,  
9 Yoneshiro, T. et al.** (2020). CD81 Controls Beige Fat Progenitor Cell Growth and Energy Balance via FAK  
10 Signaling. *Cell* **182**, 563-577 e20.
- 11 **Paulo, E. and Wang, B.** (2019). Towards a Better Understanding of Beige Adipocyte Plasticity. *Cells* **8**.
- 12 **Roh, H. C., Tsai, L. T. Y., Shao, M., Tenen, D., Shen, Y., Kumari, M., Lyubetskaya, A., Jacobs, C., Dawes,  
13 B., Gupta, R. K. et al.** (2018). Warming Induces Significant Reprogramming of Beige, but Not Brown,  
14 Adipocyte Cellular Identity. *Cell Metab* **27**, 1121-1137 e5.
- 15 **Rosenwald, M., Perdikari, A., Rulicke, T. and Wolfrum, C.** (2013). Bi-directional interconversion of brite  
16 and white adipocytes. *Nat Cell Biol* **15**, 659-67.
- 17 **Shamsi, F., Piper, M., Ho, L. L., Huang, T. L., Gupta, A., Streets, A., Lynes, M. D. and Tseng, Y. H.** (2021).  
18 Vascular smooth muscle-derived Trpv1(+) progenitors are a source of cold-induced thermogenic  
19 adipocytes. *Nat Metab* **3**, 485-495.
- 20 **Shapira, S. N. and Seale, P.** (2019). Transcriptional Control of Brown and Beige Fat Development and  
21 Function. *Obesity (Silver Spring)* **27**, 13-21.
- 22 **Shin, S., Pang, Y., Park, J., Liu, L., Lukas, B. E., Kim, S. H., Kim, K. W., Xu, P., Berry, D. C. and Jiang, Y.**  
23 (2020). Dynamic control of adipose tissue development and adult tissue homeostasis by platelet-  
24 derived growth factor receptor alpha. *Elife* **9**.
- 25 **Sin, C., Li, H. and Crawford, D. A.** (2015). Transcriptional regulation by FOXP1, FOXP2, and FOXP4  
26 dimerization. *J Mol Neurosci* **55**, 437-48.
- 27 **Snijders Blok, L., Vino, A., den Hoed, J., Underhill, H. R., Monteil, D., Li, H., Reynoso Santos, F. J., Chung,  
28 W. K., Amaral, M. D., Schnur, R. E. et al.** (2021). Heterozygous variants that disturb the transcriptional  
29 repressor activity of FOXP4 cause a developmental disorder with speech/language delays and multiple  
30 congenital abnormalities. *Genet Med* **23**, 534-542.
- 31 **Spaeth, J. M., Hunter, C. S., Bonatakis, L., Guo, M., French, C. A., Slack, I., Hara, M., Fisher, S. E., Ferrer,  
32 J., Morrissey, E. E. et al.** (2015). The FOXP1, FOXP2 and FOXP4 transcription factors are required for islet  
33 alpha cell proliferation and function in mice. *Diabetologia* **58**, 1836-44.
- 34 **Sun, C., Berry, W. L. and Olson, L. E.** (2017). PDGFRalpha controls the balance of stromal and adipogenic  
35 cells during adipose tissue organogenesis. *Development* **144**, 83-94.
- 36 **Wang, Q. A., Tao, C., Gupta, R. K. and Scherer, P. E.** (2013). Tracking adipogenesis during white adipose  
37 tissue development, expansion and regeneration. *Nat Med* **19**, 1338-44.
- 38 **Wang, W. and Seale, P.** (2016). Control of brown and beige fat development. *Nat Rev Mol Cell Biol* **17**,  
39 691-702.
- 40 **Wang, Y., Paulo, E., Wu, D., Wu, Y., Huang, W., Chawla, A. and Wang, B.** (2017). Adipocyte Liver Kinase  
41 b1 Suppresses Beige Adipocyte Renaissance Through Class IIa Histone Deacetylase 4. *Diabetes* **66**, 2952-  
42 2963.
- 43 **Wu, J., Bostrom, P., Sparks, L. M., Ye, L., Choi, J. H., Giang, A. H., Khandekar, M., Virtanen, K. A., Nuutila,  
44 P., Schaart, G. et al.** (2012). Beige adipocytes are a distinct type of thermogenic fat cell in mouse and



1 human. *Cell* **150**, 366-76.

2 **Wu, Y., Kinnebrew, M. A., Kutys, V. I. and Chawla, A.** (2020). Distinct signaling and transcriptional  
3 pathways regulate peri-weaning development and cold-induced recruitment of beige adipocytes. *Proc*  
4 *Natl Acad Sci U S A* **117**, 6883-6889.

5 **Yu, G. C., Wang, L. G., Han, Y. Y. and He, Q. Y.** (2012). clusterProfiler: an R Package for Comparing  
6 Biological Themes Among Gene Clusters. *Omics-a Journal of Integrative Biology* **16**, 284-287.

7 **Zhao, H., Zhou, W., Yao, Z., Wan, Y., Cao, J., Zhang, L., Zhao, J., Li, H., Zhou, R., Li, B. et al.** (2015).  
8 Foxp1/2/4 regulate endochondral ossification as a suppresser complex. *Dev Biol* **398**, 242-54.

9

10

1 **Figure legends**

2 **Fig.1. Ablation of *Foxp4* impairs beige adipocyte differentiation.**

3 (A) Hematoxylin and eosin (H&E) staining and immunofluorescence examination for  
4 FOXP4 on sections from BAT and sWAT of 2-month-old wild type mice. Bar,  
5 100 $\mu$ m.

6 (B) mRNA levels of *Foxp4*, *PPAR $\gamma$* , *Ucp1* during culture courses of beige adipocyte  
7 differentiation derived from stromal vascular fraction (SVF) of sWAT depot. n, 3.

8 (C) Diagram depicting that sWAT-SVF cells were treated with tamoxifen (TM) 24-hour  
9 post isolation and cultures to induce *Foxp4* knockout in beige cells, which were  
10 designated as *Foxp4<sup>fl/fl</sup>* and *Foxp4<sup>Sma<sup>Er1</sup> $\Delta/\Delta$</sup>* . Then these precursor cells underwent 8-  
11 day beige induction cultures.

12 (D) Oil Red O staining for SVF-derived beige adipocytes from (C).

13 (E-G) mRNA levels of *Foxp4*, beige selective and thermogenic markers in cells from  
14 (C). n, 3.

15 (H) Flow cytograms showing expression of for beige adipocyte progenitor cells (APC,  
16 CD31<sup>-</sup>CD45<sup>-</sup>PDGFR $\alpha$ <sup>+</sup>Sca1<sup>+</sup>CD24<sup>-</sup>) and beige preadipocytes (CD31<sup>-</sup>CD45<sup>-</sup>  
17 PDGFR $\alpha$ <sup>+</sup>Sca1<sup>+</sup>CD24<sup>+</sup>) 24-hour post tamoxifen induction in SVF cell cultures.

18 (I) Quantitative analysis for proportion of beige adipocyte progenitor cells and beige  
19 preadipocytes in (H). n, 3.

20

21 **Fig. 2. *Foxp4* deficiency disrupts beige-fibroblast balance in progenitor cells**  
22 **through regulating *Pdgfra* expression.**

23 (A) Primary precursor cells from sWAT of *Foxp4<sup>fl/fl</sup>* mice were transfected with  
24 retrovirus of *pMSCV-Cre* or *pMSCV-GFP* to induce *Foxp4* inactivation before  
25 being induced to undergo beige adipocyte differentiation. Oil Red O staining was  
26 performed 8 days post differentiation cultures.

27 (B, C) mRNA levels of thermogenic and beige selective markers in cells of (A). n, 3.

28 (D) Heatmap depicting the mRNA levels of collagen related markers in beige  
29 adipocytes in (A).

30 (E) mRNA levels of fibrotic markers in beige cells of (A). n, 3.

- 1 (F, G) qPCR validated the increased *Pdgfra* expression levels in beige adipocytes with  
2 *Foxp4* deficiency by *pMSCV-Cre* (F) or *SMA-CreER* (G). n, 3.
- 3 (H) Chromatin occupancy analysis by ChIP-seq showed the relative enrichment of  
4 *Foxp4* binding sites (black arrows) upstream of *Pdgfra* gene promoter region,  
5 based on beige adipocytes derived from SVF of wild type sWAT.
- 6 (I) Luciferase reporter assay validated the repressive activity of *Foxp4* protein in  
7 *Pdgfra* gene transcription. n, 3. The upper panel depicts the *Pdgfra*-Luc construct  
8 and potential FOXP4 binding site.

9

10 **Fig. 3. *Foxp4* deletion mildly augments beige adipocytes thermogenesis at peri-**  
11 **weaning stage.**

- 12 (A) Dorsal view of representative *Foxp4<sup>fl/fl</sup>* and *Foxp4<sup>AdipQ</sup><sup>Δ/Δ</sup>* mice at 3 weeks old.
- 13 (B) Gross morphology of BAT and sWAT depot of mice (A).
- 14 (C) H&E and immunohistochemical staining (IHC) for UCP1 on sWAT sections from  
15 *Foxp4<sup>AdipQ</sup><sup>Δ/Δ</sup>* mice of (A).
- 16 (D, E) mRNA levels of thermogenic and mitochondrial markers in sWAT.
- 17 (F) qPCR validated the relative normal expressions of beige selective marker genes in  
18 sWAT from *Foxp4<sup>AdipQ</sup><sup>Δ/Δ</sup>* mice.

19

20 **Fig. 4. FOXP4 cell-autonomously repressed beige adipocytes thermogenesis.**

- 21 (A) Representative dorsal view *Foxp4<sup>fl/fl</sup>* and *Foxp4<sup>AdipQ</sup><sup>Δ/Δ</sup>* mice at age of 2 months old.
- 22 (B) Growth curve showed that the body weights were mildly decreased in *Foxp4<sup>AdipQ</sup><sup>Δ/Δ</sup>*  
23 mice as compared to that of *Foxp4<sup>fl/fl</sup>* control mice since age of 5 months old. n, 7.
- 24 (C) H&E and IHC staining for UCP1 protein on sWAT sections from *Foxp4<sup>AdipQ</sup><sup>Δ/Δ</sup>*  
25 mice at age of 2 months old. Bar, 100μm.
- 26 (D) mRNA levels of a set of thermogenic genes in sWAT of *Foxp4<sup>AdipQ</sup><sup>Δ/Δ</sup>* mice. n, 3.
- 27 (E) Oil Red O staining 8 day post brown adipocyte differentiation from sWAT-SVF of  
28 *Foxp4<sup>fl/fl</sup>* and *Foxp4<sup>AdipQ</sup><sup>Δ/Δ</sup>* mice at age of 8 weeks.
- 29 (F) mRNA levels of thermogenic markers for beige adipocytes in (A). n, 3.
- 30 (G) Oxygen consumption rate (OCR) was measured for beige adipocytes from (E).

1       Uncoupled respiration was recorded after oligomycin inhibition of ATP synthesis,  
2       and maximal respiration following stimulation with carbonyl cyanide 4-  
3       (trifluoromethoxy) phenylhydrazone (FCCP). n, 3.

4       (H) Quantitative analysis of basal and uncoupled OCR in (G). n, 3.

5

6       **Fig. 5. Loss of *Foxp4* exacerbated beige adipocytes thermogenesis upon cold**  
7       **exposure.**

8       (A) Record of rectal temperature of 2-month-old *Foxp4<sup>AdipQ</sup><sup>ΔΔ</sup>* mice during 6-hour 4°C  
9       cold challenge. n, 8.

10      (B) Fat depot of BAT and sWAT in *Foxp4<sup>AdipQ</sup><sup>ΔΔ</sup>* mice after one-week 4°C exposure.

11      (C) H&E and IHC staining for UCP1 on sWAT sections from mice of (B). Bar, 100μm.

12      (D, E) mRNA levels of a set of thermogenic and beige selective genes. n, 3.

13      (F) Transmission electronic micrographs (TEM) of sWAT from mice (B). Bar, 2μm.

14      (G) Mitochondria DNA abundance in sWAT of mice (B). n, 4.

15

16      **Fig. 6. FOXP4 directly regulates the expressions of *Cebpβ* and *Pgc1α* in beige**  
17      **adipocyte thermogenic activation.**

18      (A) RNA-seq analysis of thermogenic marker gene expressions in sWAT of  
19      *Foxp4<sup>AdipQ</sup><sup>ΔΔ</sup>* mice under one-week 4°C challenge.

20      (B) Heatmap of the 5 putative FOXP4-targeted gene expressions in (A). Chromatin  
21      occupancy analysis of ChIP-seq were conducted for SVF-derived beige adipocytes  
22      with anti-Foxp4 antibody. 5 common targets were detected to be overlapped with  
23      RNA-seq results.

24      (C) Western blot analysis showed the increase of protein expression of PGC1α, Cebpβ  
25      and UCP1 in sWAT of mice.

26      (D) ChIP-seq profile showed the FOXP4 binding sites (black arrows) within *Cebpβ* and  
27      *Pgc1α* promoter regions, which was consistent with anti-H3K27Ac binding  
28      domain.

29      (E) Luciferase reporter assay showed that FOXP4 repressed the transactivation of  
30      *Pgc1α*-Luc by PPARγ protein in 3T3-L1 cell lines. Upper panel depicts the

- 1           construct of *Pgcl $\alpha$* -Luc and potential FOXP4 binding site.
- 2   (F) Diagram depicting the distinct role FOXP4 in beige adipocyte differentiation and
- 3           thermogenic activation. FOXP4 determines the beige/fibroblast cell fate choice in
- 4           progenitor cells through modulating *Pdgfr $\alpha$*  signaling, whereas it suppresses their
- 5           activation through repressing the expression of thermogenic genes *Pgcl $\alpha$*  and
- 6           *Cebp $\beta$* .
- 7

**Figure 1**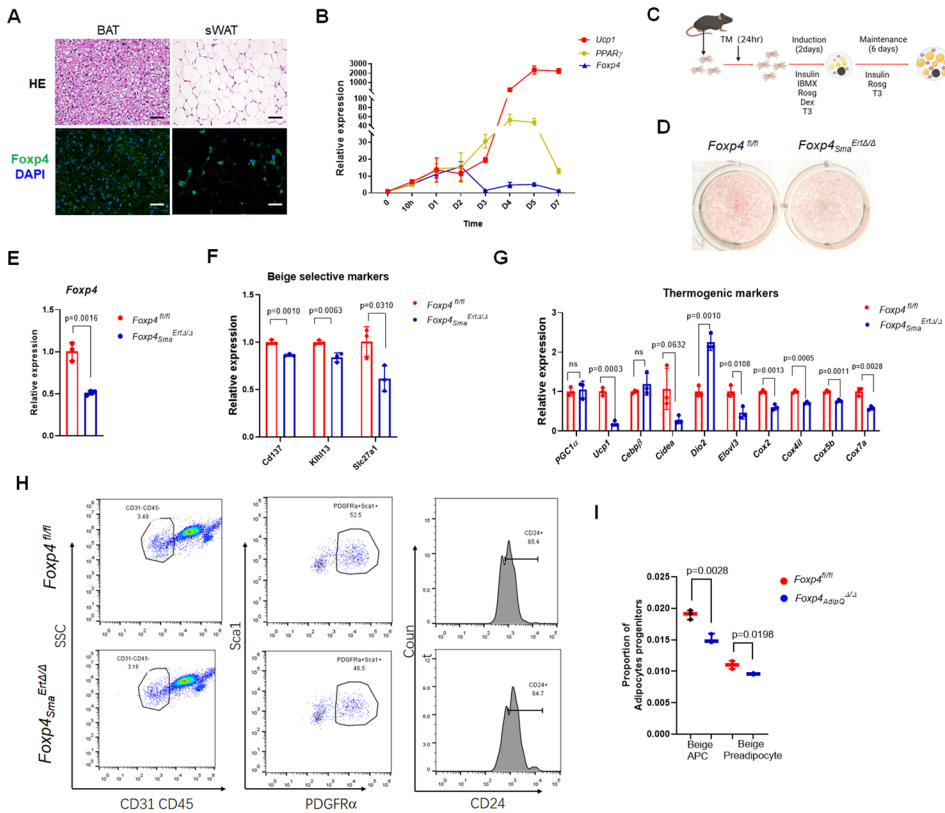

**Figure 2**

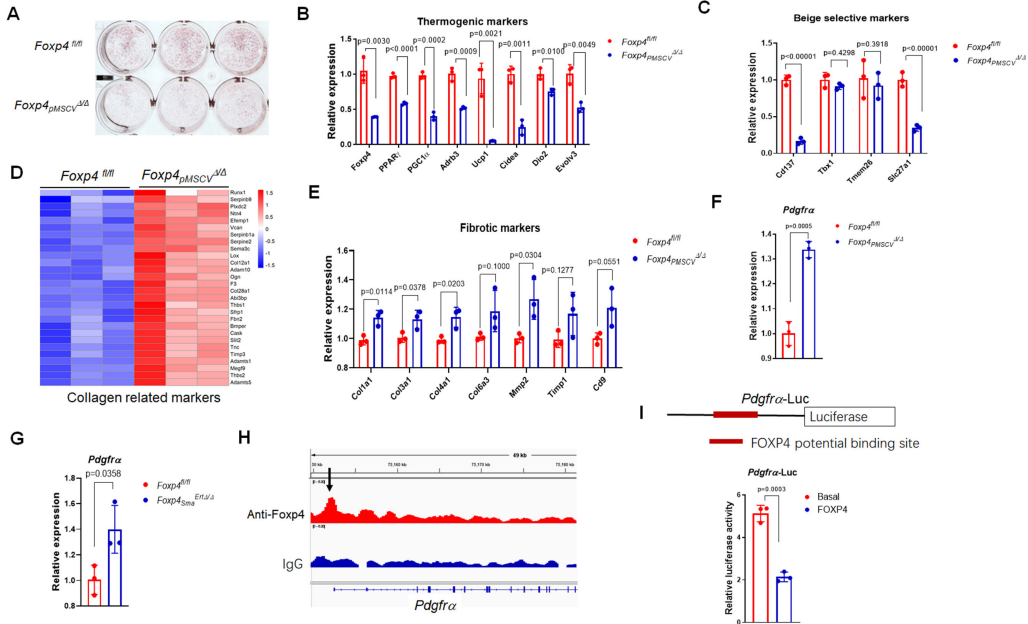



**Figure 3**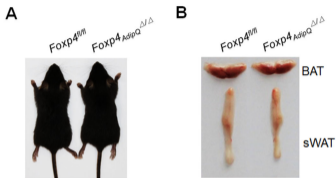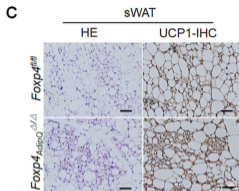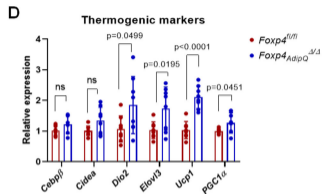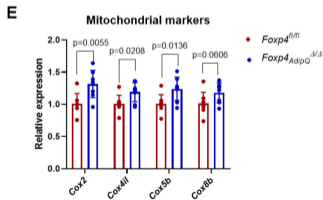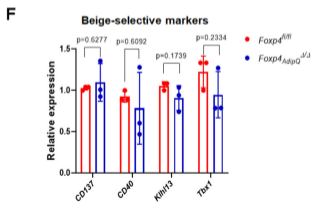

**Figure 4****A**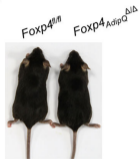**B**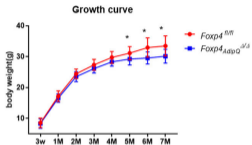**C**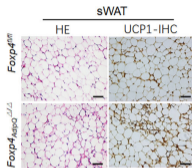**D**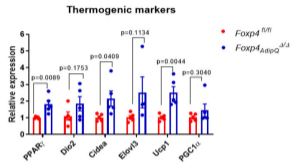**E**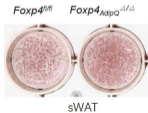**F**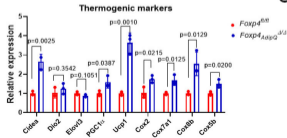**G**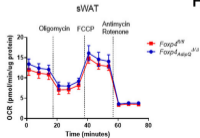**H**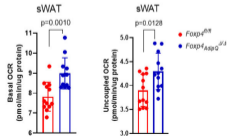

# Figure 5

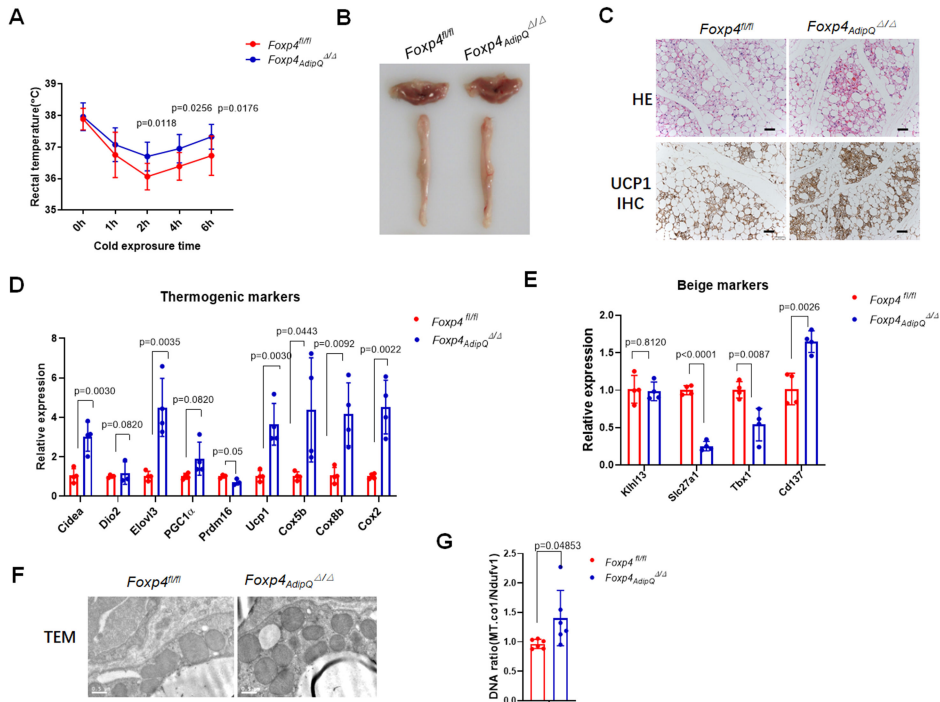

**Figure 6**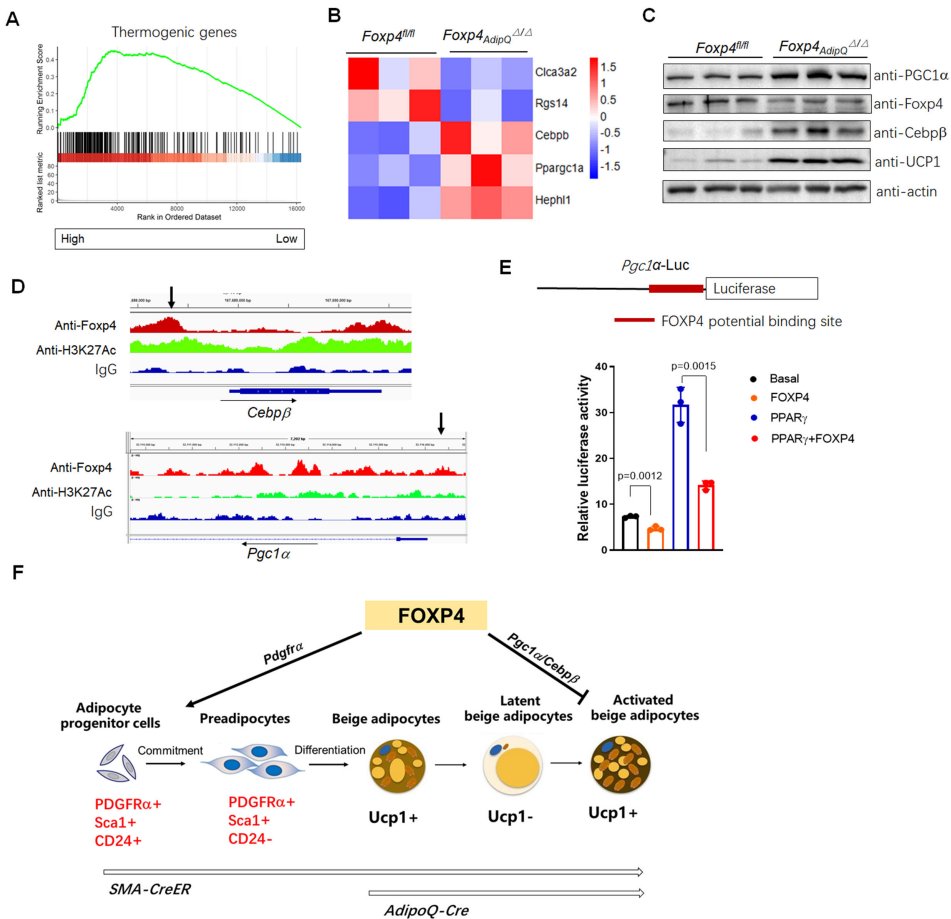

1 **Supplementary figures and figure legends**

2

**Figure S1**

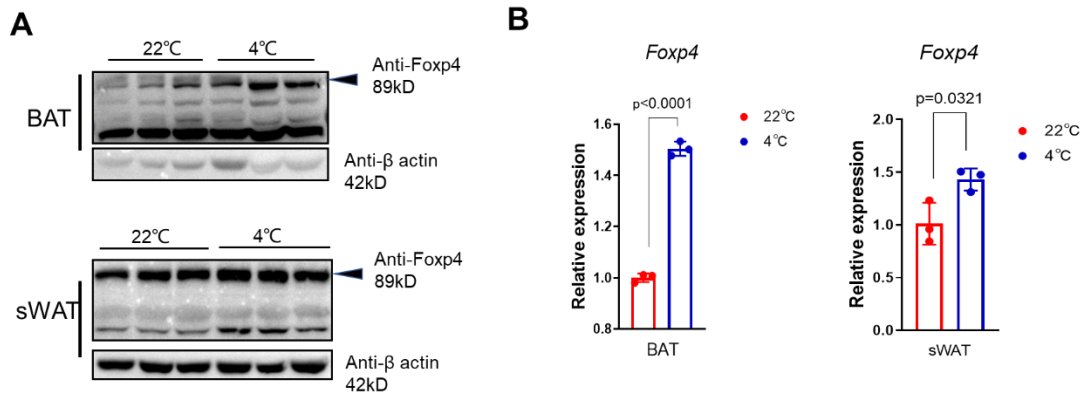

3

4 **Fig. S1. Expression of *Foxp4* in adipose tissues from *Foxp4<sup>AdipQ</sup> $\Delta/\Delta$*  mice.**

5 (A) Western blot for FOXP4 protein in BAT and sWAT of mice under room temperature  
6 (22°C) and one-week cold exposure (4°C).

7 (B) mRNA levels of *Foxp4* expression in BAT and sWAT from mice of (A). n, 3.

8

9

10

11

12

13

14

15

16

17

Figure S2

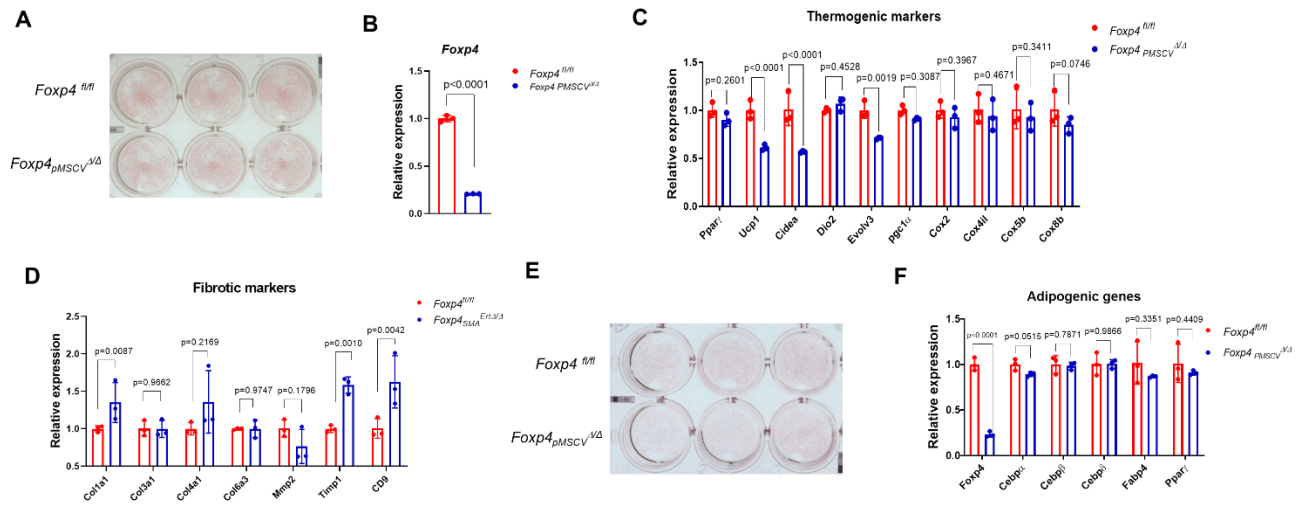

1

2 **Fig. S2. *In vitro* brown adipocyte differentiation with *Foxp4* deficiency by *pMSCV-***  
 3 ***Cre*.**

4 (A) Oil Red O staining for 8-day brown adipocyte differentiation from *pMSCV-Cre-*  
 5 transfected SVF of BAT from *Foxp4<sup>fl/fl</sup>* mice.

6 (B, C) mRNA levels of *Foxp4*, thermogenic and brown selective markers in cells of (A).  
 7 n, 3.

8 (C) mRNA levels of fibrotic cell marker genes in beige differentiation from SVF of  
 9 *Foxp4<sup>Sma<sup>Ert</sup>Δ/Δ</sup>* mice with *Foxp4* inactivation induced by tamoxifen in cultures.

10 (D) Oil Red O staining for 8-day white adipocyte differentiation from *pMSCV-Cre-*  
 11 transfected SVF of sWAT from *Foxp4<sup>fl/fl</sup>* mice.

12 (E) mRNA levels of adipogenesis markers in cells of (A). n, 3.

13

Figure S3

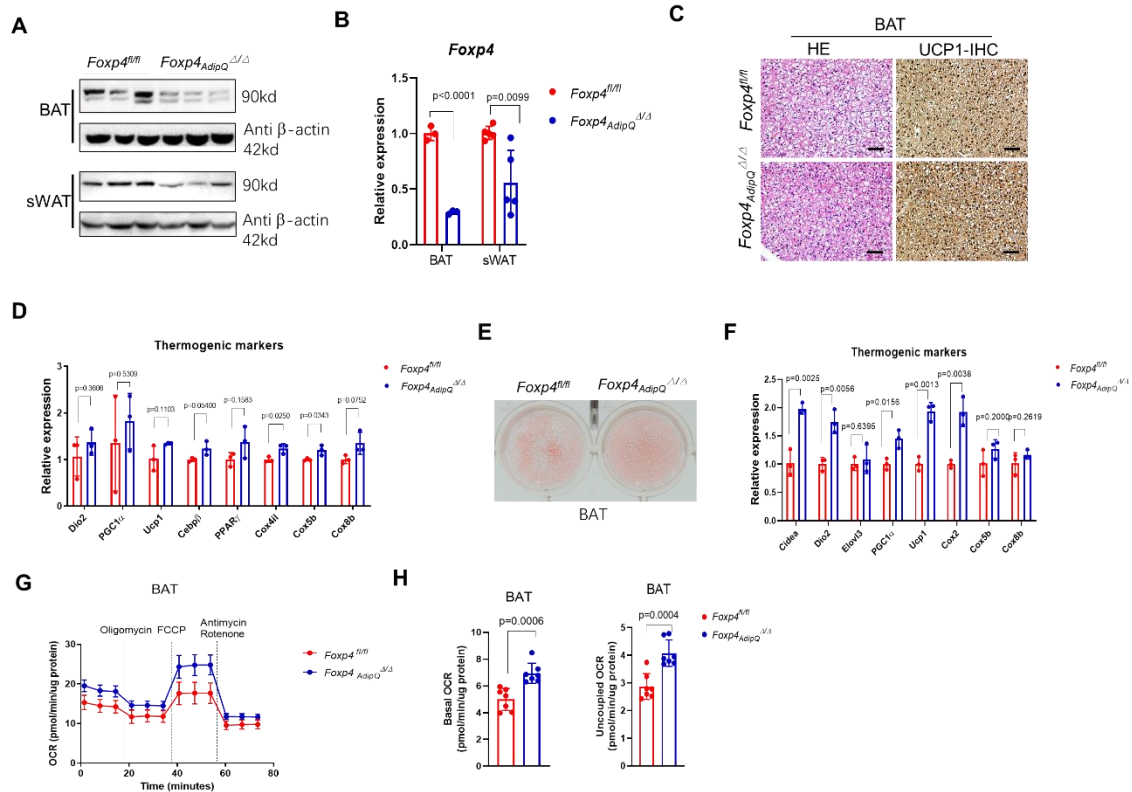

1 **Fig. S3. Thermogenesis in BAT of *Foxp4AdipQ*<sup>Δ/Δ</sup> mice.**

2 (A) Western blot for FOXP4 protein in BAT and sWAT of *Foxp4*<sup>fl/fl</sup> and *Foxp4AdipQ*<sup>Δ/Δ</sup>  
3 mice at age of 2 months old.

4 (B) Assessment of *Foxp4* mRNA expression in BAT and sWAT from mice by qPCR. n,  
5 3.

6 (C) H&E and immunohistochemical staining (IHC) for UCP1 on BAT sections from  
7 *Foxp4AdipQ*<sup>Δ/Δ</sup> mice.

8 (D) mRNA levels of thermogenic and mitochondrial markers in BAT.

9 (E) Oil Red O staining 8 day post brown adipocyte differentiation from BAT-SVF of  
10 *Foxp4*<sup>fl/fl</sup> and *Foxp4AdipQ*<sup>Δ/Δ</sup> mice at age of 8 weeks.

11 (F) mRNA levels of thermogenic markers for brown adipocytes in (E). n, 3.

12 (G) Oxygen consumption rate (OCR) was measured for brown adipocytes from (E).  
13 Uncoupled respiration was recorded after oligomycin inhibition of ATP synthesis,  
14 and maximal respiration following stimulation with carbonyl cyanide 4-  
15 (trifluoromethoxy) phenylhydrazone (FCCP). n, 3.

16 (H) Quantitative analysis of basal and uncoupled OCR in (G). n, 3.

Figure S4

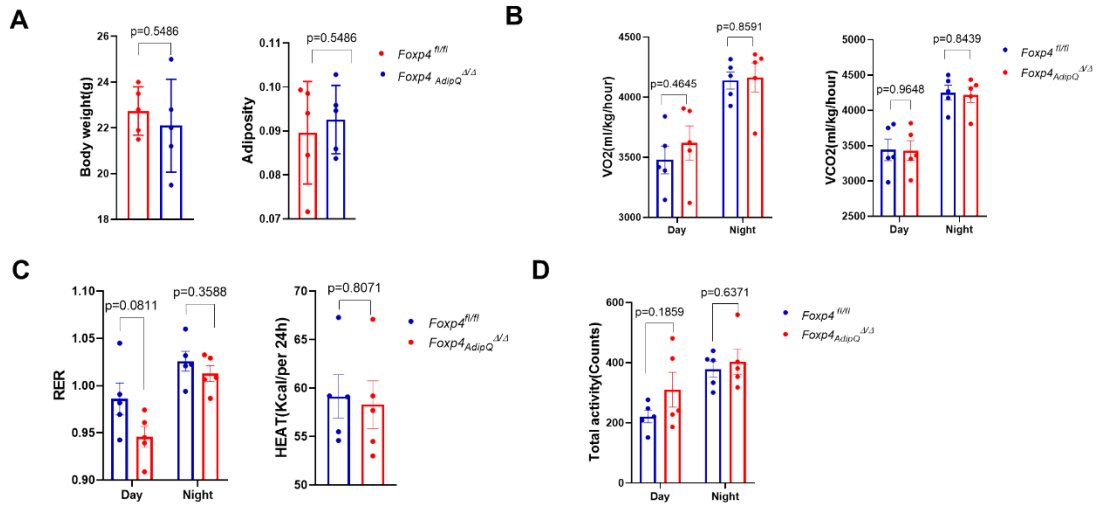

1 **Fig. S4. Metabolic analysis for *Foxp4<sup>AdipQ $\Delta\Delta$</sup>*  mice.**

2 (A) Body weight and relative adiposity of *Foxp4<sup>fl/fl</sup>* and *Foxp4<sup>AdipQ $\Delta\Delta$</sup>*  mice during day  
3 and night in metabolic cages at age of 3 months old. n, 5.

4 (B) Quantification of O<sub>2</sub> and CO<sub>2</sub> consumption of mice under room temperature. n, 5.

5 (C) RER and heat production of mice. n, 5.

6 (D) Total activity of mice. n, 5.

7

8

9

10

11

12

13

14

15

16

17

18

19



## Figure S5

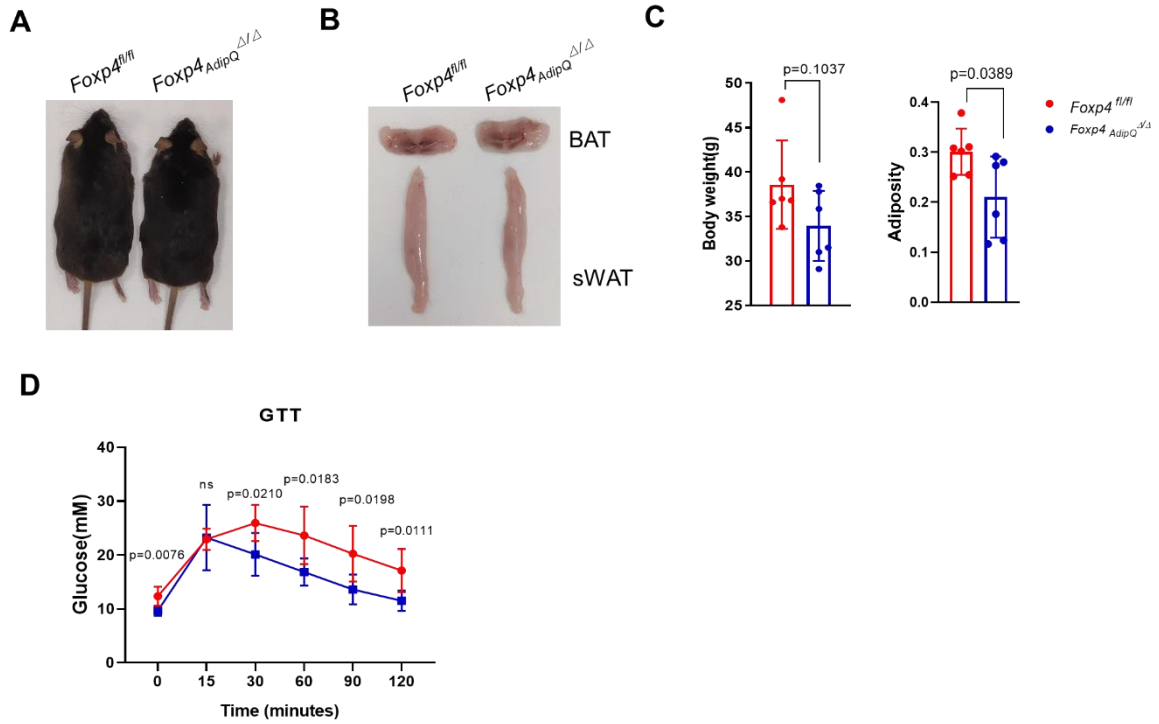

1

2 **Fig. S5. *Foxp4* deficiency protects mice from HFD-fed obesity.**

3 (A) Dorsal view of representative *Foxp4<sup>fl/fl</sup>* and *Foxp4<sup>AdipQ<sup>Δ/Δ</sup></sup>* mice of after 8-week  
4 feeding with HFD at age of 2 months.

5 (B) Representative fat depot of BAT and sWAT from mice of (A).

6 (C) Body weight and relative adiposity of HFD-fed mice of (A). n, 6.

7 (D) GTT of HFD-fed mice. n, 6.

8

Figure S6

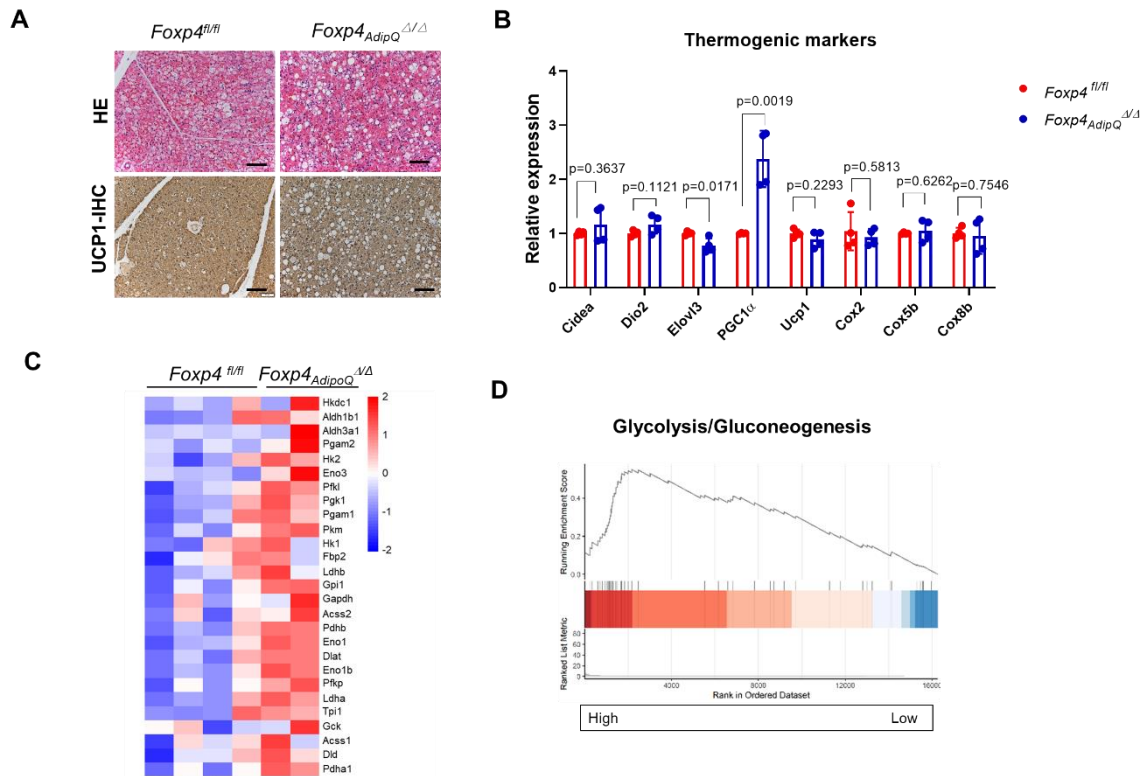

1

2 **Fig. S6. BAT thermogenesis in *Foxp4<sup>AdipQ</sup><sup>Δ/Δ</sup>* mice upon cold exposure.**

3 (A) H&E and immunohistochemistry (IHC) staining for UCP1 protein on BAT sections  
4 from *Foxp4<sup>AdipQ</sup><sup>Δ/Δ</sup>* mice after one-week cold exposure at 4°C.

5 (B) Thermogenesis in BAT of (A) assessed by qPCR with selective markers (*Cidea*,  
6 *Dio2*, *Elovl3*, *PGC1 $\alpha$* , *Ucp1*, *Cox2*, *Cox5b*, *Cox8b*). n, 3.

7 (C) Heatmap depicting the mRNA levels of glycolytic genes in beige adipocytes from  
8 sWAT in *Foxp4<sup>AdipQ</sup><sup>Δ/Δ</sup>* mice after one-week cold exposure at 4°C.

9 (D) RNA-seq analysis of glycolytic marker gene expressions in sWAT of (C).

10

## Figure S7

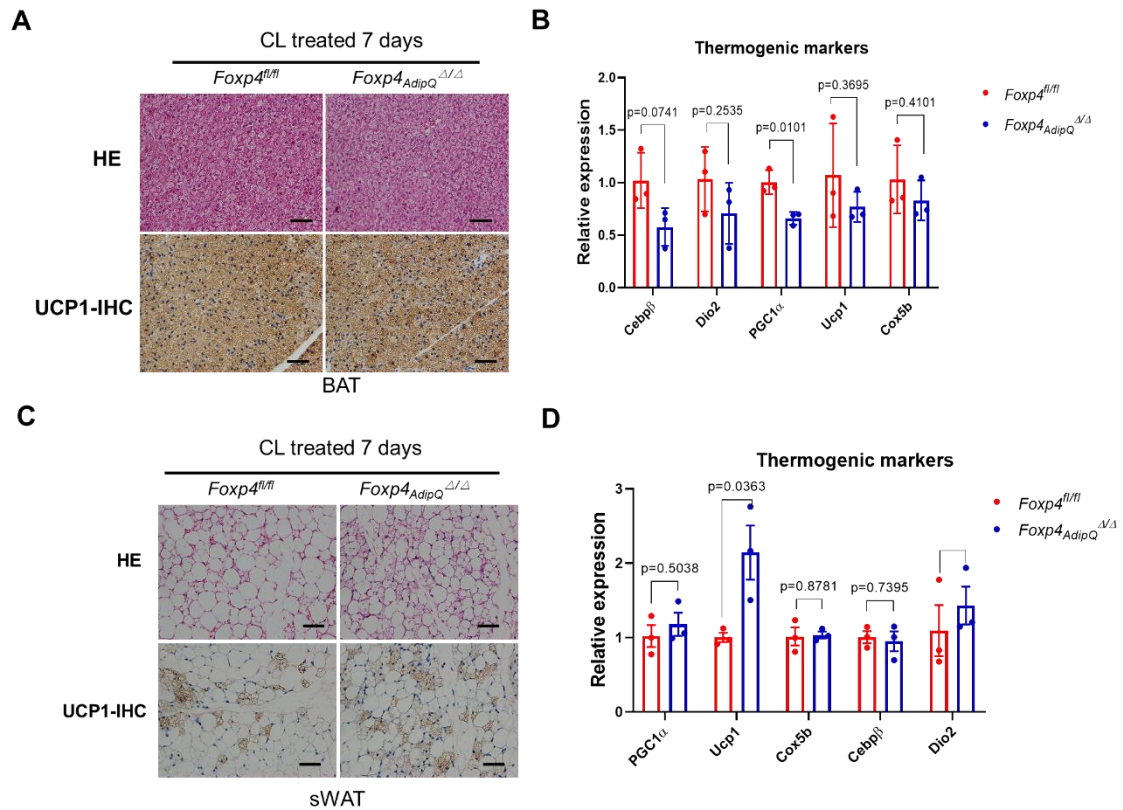

1

2 **Fig. S7. Thermogenic activation in CL-316,243-stimulated *Foxp4<sup>AdipQ<sup>Δ/Δ</sup></sup>* mice.**

3 (A, C) H&E and IHC staining for UCP1 on BAT (A) and sWAT (C) sections from mice  
4 stimulated with CL-316,243 for 7 days.

5 (B, D) qPCR analysis for thermogenic gene expressions in BAT (B) and sWAT (D) from  
6 CL-316,243-stimulated mice. n, 5.

7

8

9

10

11

12

13

**Supplementary table S1 primers for qPCR and genotyping**

| primer for qPCR                 |   |                           |
|---------------------------------|---|---------------------------|
| <i>Foxp4</i>                    | F | GTGTCTGTGGCCATGATGTC      |
|                                 | R | TCTTTGGGCTGCTGTTTCC       |
| <i>Adrb3</i>                    | F | GGCCCTCTCTAGTCCCAG        |
|                                 | R | TAGCCATCAAACCTGTTGAGC     |
| <i>Ucp1</i>                     | F | ACTGCCACACCTCCAGTCATT     |
|                                 | R | CTTTGCCTCACTCAGGATTGG     |
| <i>PGC1<math>\alpha</math></i>  | F | AGCCGTGACCACTGACAACGAG    |
|                                 | R | GCTGCATGGTTCTGAGTGCTAAG   |
| <i>Cebp<math>\alpha</math></i>  | F | TGGACAAGAACAGCAACGAG      |
|                                 | R | TCACTGGTCAACTCCAGCAC      |
| <i>Cebp<math>\beta</math></i>   | F | ACGACTTCCTCTCCGACCTCT     |
|                                 | R | CGAGGCTCACGTAACCGTAGT     |
| <i>Dio2</i>                     | F | CAGTGTGGTGCACGTCTCCAATC   |
|                                 | R | TGAACCAAAGTTGACCACCAG     |
| <i>Prdm16</i>                   | F | CCACCAGCGAGGACTTCAC       |
|                                 | R | GGAGGACTCTCGTAGCTCGAA     |
| <i>Cox2</i>                     | F | GCAAGCATAAGACTGGACCAA     |
|                                 | R | TTGTTGGCATCTGTGTAAGAGAATC |
| <i>Cox4il</i>                   | F | ACCAAGCGAATGCTGGACAT      |
|                                 | R | GGCGGAGAAGCCCTGAA         |
| <i><math>\beta</math>-actin</i> | F | AGAGGGAAATCGTGCGTGACA     |
|                                 | R | CACTGTGTTGGCATAGAGGTC     |
| <i>Elovl3</i>                   | F | TCCGCGTTCTCATGTAGGTCT     |
|                                 | R | GGACCTGATGCAACCCTATGA     |
| <i>Cox5b</i>                    | F | GCTGCATCTGTGAAGAGGACAAC   |
|                                 | R | CAGCTTGTAATGGGTCCACAGT    |
| <i>Cox8b</i>                    | F | TGTGGGGATCTCAGCCATAGT     |
|                                 | R | AGTGGGCTAAGACCCATCCTG     |
| <i>PPAR<math>\alpha</math></i>  | F | GCGTACGGCAATGGCTTTAT      |
|                                 | R | GAACGGCTTCCTCAGGTTCTT     |
| <i>PPAR<math>\gamma</math></i>  | F | GGAAAGACAACGGACAAATCAC    |
|                                 | R | TACGGATCGAAACTGGCAC       |
| <i>Cox7a1</i>                   | F | CAGCGTCATGGTCAGTCTGT      |
|                                 | R | AGAAAACCGTGTGGCAGAGA      |
| <i>Cidea</i>                    | F | TGCTCTTCTGTATCGCCCAGT     |
|                                 | R | GCCGTGTTAAGGAATCTGCTG     |
| <i>Rgs2</i>                     | F | GAGAAAATGAAGCGGACACTCT    |
|                                 | R | GCAGCCAGCCATATTTACTG      |
| <i>CD137</i>                    | F | CGTGCAGAACTCCTGTGATAAC    |
|                                 | R | GTCCACCTATGCTGGAGAAGG     |

|                                            |   |                         |
|--------------------------------------------|---|-------------------------|
| <i>Them26</i>                              | F | ACCCTGTCATCCCACAGAG     |
|                                            | R | TGTTTGGTGGAGTCCTAAGGTC  |
| <i>Tbx1</i>                                | F | GGCAGGCAGACGAATGTTC     |
|                                            | R | TTGTCATCTACGGGCACAAAG   |
| <i>Cd40</i>                                | F | TTGTTGACAGCGGTCCATCTA   |
|                                            | R | CCATCGTGGAGGTACTGTTTG   |
| <i>Ear2</i>                                | F | CCTGTAACCCCAGAACTCCA    |
|                                            | R | CAGATGAGCAAAGGTGCAAA    |
| <i>Klhl13</i>                              | F | AGAATTGGTTGCTGCAATACTCC |
|                                            | R | AAGGCACAGTTTCAAGTGCTG   |
| <i>Slc27a1</i>                             | F | CTGGGACTTCCGTGGACCT     |
|                                            | R | TCTTGCAGACGATACGCAGAA   |
| <b><i>primer for genotyping</i></b>        |   |                         |
| <i>Foxp4-Floxed</i>                        | F | TGGAGGGACTGGGATTAGAAC   |
|                                            | R | ACGGGAGGCTGAACAACAC     |
| <i>Cre</i>                                 | F | TTTCCCGCAGAACCTGAAGA    |
|                                            | R | GGTGCTAACCAGCGTTTTTCGT  |
| <b><i>Pdgfr<math>\alpha</math>-Luc</i></b> |   |                         |
| Pdgfr $\alpha$ -promoter                   | F | CAGAGGGCAGGCATTTGGTAGT  |
|                                            | R | GCTTACTGGGACGAACACCA    |

1  
2  
3  
4  
5
